# Supplementary material for: The impact of Trans-Pacific Partnership agreement on the Canadian economy
Source: Springer Nature journal article supplement (doi:10.1186/s40008-017-0102-y), 2018-01-24
Supplement: MOESM1 [file 15411880]

*!<
 ==================================
 Global Trade Analysis Project
 The GTAP Modeling Framework
 GTAP Version 6.2
 September 2003
 ==================================

 For documentation see:
 (a) Hertel, T.W. and M.E. Tsigas, "Structure of the Standard GTAP Model",
 Chapter 2 in T.W. Hertel (editor) "Global Trade Analysis: Modeling and
 Applications", Cambridge University Press, 1997.

 (b) R.A. McDougall, "A New Regional Household Demand System for GTAP",
 GTAP Technical Paper #20, Center for Global Trade Analysis, Purdue
 University

 (c) Hertel T.W., K. Itakura and R.A. McDougall, "GTAP.TAB: The Standard
 GTAP Model" (yet to be drafted), GTAP Technical Paper, Center for Global
 Trade Analysis, Purdue University,
 http://www.agecon.purdue.edu/gtap/techpapr/. This technical paper
 documents all of the changes since the GTAP book TAB file.

 --------------------
 HISTORY of this file
 --------------------

 Version 6.2 fixes bugs and provides minor enhancements:
 - EV_ALT, CNTdpar fix
 - SX_IR fix
 - new treatment of export and import tariffs
 - original levels defined for power-of-tax variables
 - CNTalleffir range extended from TRAD_COMM to DEMD_COMM
 - INCOME formula, quantity index equations more AnalyzeGE-friendly

 Version 6.1 fixes bugs in 6.0:
 - Computation of tax receipts ratio is now separately done for total
 tax and indirect tax (equation DTAXRATIO and DINDTAXRATIO).
 - Computation of DTBALR, the ratio of the trade balance to regional
 income, has been corrected (equation DTBALRATIO).
 - Computation of EV_ALT, the summary variable for EV, has been
 corrected (equation EV_DECOMPOSITION).
 Also the notation has been changed for the tax-income ratio variables:
 TGCR -> del_taxrgc, TPCR -> del_taxrpc, TIUR -> del_taxriu,
 TFUR -> del_taxrfu, TOUTR -> del_taxrout, TEXPR -> del_taxrexp,
 TIMPR -> del_taxrimp, TINCR -> del_taxrinc, DTAXR -> del_ttaxr.

 Version 6.0 replaces version 5.0 used in the August 2000 short course, but
 never formally released. The subsequent changes have been quite
 significant (primarily focused on final demand and welfare decomposition),
 so we decided to give it a new version number. This also prevents
 confusion with the soon to be released version 5.0 GTAP data set.

 The differences with the previous publicly released version of GTAP.TAB,
 Version 4.1, dated November 1998, are numerous. One goal of this version
 is to reorganize the TAB file which had not be redesigned since its
 inception. In addition, there is a long list of substantive changes that
 have been made between Version 4.1 and 6.0. These include:

 - provision for multiple margins sectors (to accommodate post version
 5 GTAP data)
 - introduction of the new theory of final demand following McDougall's
 GTAP Technical Paper #20
 - modification of the welfare decomposition following McDougall's
 Technical Paper #20
 - correction to the treatment of technical change, ao, in the presence
 of ESUBT > 0 (affects equations VADEMAND and INTDEMAND)
 - addition of import-augmenting "technical change" in the Armington
 nest: ams which can be used to lower the effective price of imported
 products
 - specification of Baldwin-type capital accmulation effects following
 Francois' Technical Paper #7
 - introduction of uniform consumption tax instrument, tp(r)

 ----------------------------------
 Overview of the GTAP.TAB Structure
 ----------------------------------
 Preliminaries:
 FILES
 SETS
 READ statements of Base Data
 Common VARIABLES
 Common COEFFICIENTS

 Modules:
 1. Government Consumption
 2. Private Consumption
 3. Firms
 4. Investment, Global Bank, and Savings
 5. International Trade
 6. International Transport Services
 7. Regional Household
 8. Equilibrium Conditions

 Appendices:
 A. Summary Indices
 B. Equivalent Variation
 C. Welfare Decomposition
 D. Terms of Trade Decomposition
>!*

*!<
 -----
 FILES
 -----
>!*

**File**
 GTAPSETS *# file with set specification #*;
**File**
 GTAPDATA *# file containing all base data #*;
**File**
 GTAPPARM *# file containing behavioral parameters #*;

*!<
 ----
 SETS
 ----

 Sets define relevant groupings of entities over which we will be
 performing operations in the model. SUBSETS are defined in order to
 facilitate summation over only a portion of a given group, e.g., tradeable
 commodities. Users with access to GEMPACK can increase the maximum set
 sizes to permit larger aggregations, provided you have sufficient RAM for
 implementing them The standard model (10x10 aggregation with decomposition
 code) is designed to run with 16 Mb of RAM.

 Aide-Memoire for Sets
 ---------------------

 |--------------------------------------|
 | DEMD_COMM |
 |----------------------------------------------------|
 | ENDW_COMM | TRAD_COMM | CGDS_COMM |
 |----------------------------------------------------|
 | NSAV_COMM |
 |----------------------------------------------------|
 | PROD_COMM |
 |----------------------------------------|

 For Endowments,
 |-------------------------|
 | ENDW_COMM |
 |-------------------------|
 | ENDWM_COMM | ENDWS_COMM |
 |-------------------------|
>!*

**Coefficient**
 VERNUM *# version of GTAP data #*;
**Read**
 VERNUM **from** **file** GTAPDATA **header** *"DVER"*;
**Update** (**change**)
 VERNUM = 0.0; *! force it to be copied to update file !*

**Set**
 REG *# regions in the model #*
 **maximum** **size** 10 **read** **elements** **from** **file** GTAPSETS **header** *"H1"*;
**Set**
 TRAD_COMM *# traded commodities #*
 **maximum** **size** 10 **read** **elements** **from** **file** GTAPSETS **header** *"H2"*;
**Set**
 MARG_COMM *# margin commodities #*
 **maximum** **size** 10 **read** **elements** **from** **file** GTAPSETS **header** *"MARG"*;
**Subset**
 MARG_COMM **is** **subset** **of** TRAD_COMM;
**Set**
 NMRG_COMM *# non-margin commodities #* = TRAD_COMM - MARG_COMM;
**Set**
 CGDS_COMM *# capital goods commodities #*
 **maximum** **size** 1 **read** **elements** **from** **file** GTAPSETS **header** *"H9"*;
**Set**
 ENDW_COMM *# endowment commodities #*
 **maximum** **size** 5 **read** **elements** **from** **file** GTAPSETS **header** *"H6"*;
**Set**
 PROD_COMM *# produced commodities #* = TRAD_COMM **union** CGDS_COMM;
**Set**
 DEMD_COMM *# demanded commodities #* = ENDW_COMM **union** TRAD_COMM;
**Set**
 NSAV_COMM *# non-savings commodities #* = DEMD_COMM **union** CGDS_COMM;
**Subset**
 PROD_COMM **is** **subset** **of** NSAV_COMM;

*!<
 Check for non-overlapping sets (users can't use the same name for elements
 of ENDW_COMM, TRAD_COMM or CGDS_COMM).
>!*

**Coefficient**
 SIZE_TRAD *# size of TRAD_COMM set #*;
**Formula**
 SIZE_TRAD = **sum**(i,TRAD_COMM, 1);
**Coefficient**
 SIZE_ENDW *# size of ENDW_COMM set #*;
**Formula**
 SIZE_ENDW = **sum**(i,ENDW_COMM, 1);
**Coefficient**
 SIZE_DEMD *# size of DEMD_COMM set #*;
**Formula**
 SIZE_DEMD = **sum**(i,DEMD_COMM, 1);
**Assertion** (**initial**)
 SIZE_DEMD = SIZE_TRAD + SIZE_ENDW;

**Coefficient**
 SIZE_CGDS *# size of CGDS_COMM set #*;
**Formula**
 SIZE_CGDS = **sum**(i,CGDS_COMM, 1);
**Coefficient**
 SIZE_PROD *# size of PROD_COMM set #*;
**Formula**
 SIZE_PROD = **sum**(i,PROD_COMM, 1);
**Assertion** (**initial**)
 SIZE_PROD = SIZE_TRAD + SIZE_CGDS;

*!<
 The sluggish endowments are now defined dynamically, based on the variable
 SLUG. SLUG is a binary variable that is zero for mobile endowments and
 one for sluggish endowments. We must define and read in this variable
 before proceeding further.
>!*
**Coefficient** (**integer**,**parameter**) (**all**,i,ENDW_COMM)
 SLUG(i) *# sluggish primary factor endowments #*;
**Read**
 SLUG **from** **file** GTAPPARM **header** *"SLUG"*;

**Set**
 ENDWS_COMM
 *# sluggish endowment commodities #* = (**all**,i,ENDW_COMM: SLUG(i)>0);
**Set**
 ENDWM_COMM
 *# mobile endowment commodities #* = ENDW_COMM - ENDWS_COMM;
**Set**
 ENDWC_COMM *# capital endowment commodity #* (capital);
*!<
 This single element set is defined for the sake of convenience.
>!*
**Subset**
 ENDWC_COMM **is** **subset** **of** ENDW_COMM;

*!<
 ----------------------------
 READ Statements of Base Data
 ----------------------------

 We read in here almost all the base data, and define variables and
 coefficients associated with them. A few data arrays used each in a
 single module are read in those modules: VKB, VTMFSD, and DPARSUM.

 The READ statements are divided into six sections:

 Saving
 Government Consumption
 Private Consumption
 Firms
 Global Bank
 International Trade and Transport

 Since these are invariant for each solution of the model, they are termed
 coefficients. Coefficients are assigned upper case to distinguish them
 from variables. (This is purely cosmetic, as GEMPACK is not
 case-sensitive.) Variables in GEMPACK are assigned lower case labels to
 denote the fact that they are percentage changes. In some cases, original
 levels values for selected variables are defined to permit the user to
 compare post-simulation levels values across several simulations.

 The updating command indicates how the new level of the coefficient will
 be computed based on the previous solution of the linearized equations.
 Note that the notation used in the update commands is a shorthand for
 total differentials of these coefficient values. Thus, w * v indicates
 that we want to take the total differential of W * V, plug in the
 calculated values of w and v, and add this to the base level in order to
 obtain a revised value for this product.
>!*

*!<
 Saving
 ------
>!*

**Variable** (**all**,r,REG)
 psave(r) *# price of savings in region r #*;
**Variable** (**all**,r,REG)
 qsave(r) *# regional demand for NET savings #*;
**Coefficient** (**all**,r,REG)
 SAVE(r) *# expenditure on NET savings in region r valued at agent's prices #*;
**Update** (**all**,r,REG)
 SAVE(r) = psave(r) * qsave(r);
**Read**
 SAVE **from** **file** GTAPDATA **header** *"SAVE"*;

*!<
 Government Consumption
 ----------------------
>!*

**Variable** (**all**,i,TRAD_COMM)(**all**,s,REG)
 pgd(i,s) *# price of domestic i in government consumption in s #*;
**Variable** (**orig_level**=VDGM)(**all**,i,TRAD_COMM)(**all**,s,REG)
 qgd(i,s) *# government hhld demand for domestic i in region s #*;
**Coefficient** (**ge** 0)(**all**,i,TRAD_COMM)(**all**,r,REG)
 VDGA(i,r) *# government consumption expenditure on domestic i in r #*;
**Update** (**all**,i,TRAD_COMM)(**all**,r,REG)
 VDGA(i,r) = pgd(i,r) * qgd(i,r);
**Read**
 VDGA **from** **file** GTAPDATA **header** *"VDGA"*;

**Variable** (**orig_level**=1.0)(**all**,i,NSAV_COMM)(**all**,r,REG)
 pm(i,r) *# market price of commodity i in region r #*;
**Coefficient** (**ge** 0)(**all**,i,TRAD_COMM)(**all**,r,REG)
 VDGM(i,r) *# government consumption expenditure on domestic i in r #*;
**Update** (**all**,i,TRAD_COMM)(**all**,r,REG)
 VDGM(i,r) = pm(i,r) * qgd(i,r);
**Read**
 VDGM **from** **file** GTAPDATA **header** *"VDGM"*;

**Variable** (**all**,i,TRAD_COMM)(**all**,s,REG)
 pgm(i,s) *# price of imports of i in government consumption in s #*;
**Variable** (**orig_level**=VIGM)(**all**,i,TRAD_COMM)(**all**,s,REG)
 qgm(i,s) *# government hhld demand for imports of i in region s #*;
**Coefficient** (**ge** 0)(**all**,i,TRAD_COMM)(**all**,r,REG)
 VIGA(i,r) *# government consumption expenditure on imported i #*;
**Update** (**all**,i,TRAD_COMM)(**all**,r,REG)
 VIGA(i,r) = pgm(i,r) * qgm(i,r);
**Read**
 VIGA **from** **file** GTAPDATA **header** *"VIGA"*;

**Variable** (**orig_level**=1.0)(**all**,i,TRAD_COMM)(**all**,r,REG)
 pim(i,r) *# market price of composite import i in region r #*;
**Coefficient** (**ge** 0)(**all**,i,TRAD_COMM)(**all**,r,REG)
 VIGM(i,r) *# gov't consumption expenditure on i in r #*;
**Update** (**all**,i,TRAD_COMM)(**all**,r,REG)
 VIGM(i,r) = pim(i,r) * qgm(i,r);
**Read**
 VIGM **from** **file** GTAPDATA **header** *"VIGM"*;

*!<
 Private Consumption
 -------------------
>!*

**Variable** (**all**,i,TRAD_COMM)(**all**,s,REG)
 ppd(i,s) *# price of domestic i to private households in s #*;
**Variable** (**orig_level**=VDPM)(**all**,i,TRAD_COMM)(**all**,s,REG)
 qpd(i,s) *# private hhld demand for domestic i in region s #*;
**Coefficient** (**ge** 0)(**all**,i,TRAD_COMM)(**all**,r,REG)
 VDPA(i,r) *# private consumption expenditure on domestic i in r #*;
**Update** (**all**,i,TRAD_COMM)(**all**,r,REG)
 VDPA(i,r) = ppd(i,r) * qpd(i,r);
**Read**
 VDPA **from** **file** GTAPDATA **header** *"VDPA"*;

**Coefficient** (**ge** 0)(**all**,i,TRAD_COMM)(**all**,r,REG)
 VDPM(i,r) *# private consumption expenditure on domestic i in r #*;
**Update** (**all**,i,TRAD_COMM)(**all**,r,REG)
 VDPM(i,r) = pm(i,r) * qpd(i,r);
**Read**
 VDPM **from** **file** GTAPDATA **header** *"VDPM"*;

**Variable** (**all**,i,TRAD_COMM)(**all**,s,REG)
 ppm(i,s) *# price of imports of i by private households in s #*;
**Variable** (**orig_level**=VIPM)(**all**,i,TRAD_COMM)(**all**,s,REG)
 qpm(i,s) *# private hhld demand for imports of i in region s #*;
**Coefficient** (**ge** 0)(**all**,i,TRAD_COMM)(**all**,r,REG)
 VIPA(i,r) *# private consumption expenditure on imported i in r #*;
**Update** (**all**,i,TRAD_COMM)(**all**,r,REG)
 VIPA(i,r) = ppm(i,r) * qpm(i,r);
**Read**
 VIPA **from** **file** GTAPDATA **header** *"VIPA"*;

**Coefficient** (**ge** 0)(**all**,i,TRAD_COMM)(**all**,r,REG)
 VIPM(i,r) *# private consumption expenditure on i in r #*;
**Update** (**all**,i,TRAD_COMM)(**all**,r,REG)
 VIPM(i,r)= pim(i,r) * qpm(i,r);
**Read**
 VIPM **from** **file** GTAPDATA **header** *"VIPM"*;

*!<
 Firms
 -----
>!*

**Variable** (**all**,i,NSAV_COMM)(**all**,r,REG)
 ps(i,r) *# supply price of commodity i in region r #*;
**Variable** (**orig_level**=VOM)(**all**,i,NSAV_COMM)(**all**,r,REG)
 qo(i,r) *# industry output of commodity i in region r #*;
**Coefficient** (**ge** 0)(**all**,i,ENDW_COMM)(**all**,r,REG)
 EVOA(i,r) *# value of commodity i output in region r #*;
**Update** (**all**,i,ENDW_COMM)(**all**,r,REG)
 EVOA(i,r) = ps(i,r) * qo(i,r);
**Read**
 EVOA **from** **file** GTAPDATA **header** *"EVOA"*;

**Variable** (**all**,i,ENDW_COMM)(**all**,j,PROD_COMM)(**all**,r,REG)
 pfe(i,j,r) *# firms' price for endowment commodity i in ind. j, region r #*;
**Variable** (**orig_level**=VFM)(**all**,i,ENDW_COMM)(**all**,j,PROD_COMM)(**all**,r,REG)
 qfe(i,j,r) *# demand for endowment i for use in ind. j in region r #*;
**Coefficient** (**ge** 0)(**all**,i,ENDW_COMM)(**all**,j,PROD_COMM)(**all**,r,REG)
 EVFA(i,j,r) *# producer expenditure on i by j in r at agent's prices #*;
**Update** (**all**,i,ENDW_COMM)(**all**,j,PROD_COMM)(**all**,r,REG)
 EVFA(i,j,r) = pfe(i,j,r) * qfe(i,j,r);
**Read**
 EVFA **from** **file** GTAPDATA **header** *"EVFA"*;

**Variable** (**all**,i,TRAD_COMM)(**all**,j,PROD_COMM)(**all**,s,REG)
 pfd(i,j,s) *# price index for domestic purchases of i by j in region s #*;
**Variable** (**orig_level**=VDFM)(**all**,i,TRAD_COMM)(**all**,j,PROD_COMM)(**all**,s,REG)
 qfd(i,j,s) *# domestic good i demanded by industry j in region s #*;
**Coefficient** (**ge** 0)(**all**,i,TRAD_COMM)(**all**,j,PROD_COMM)(**all**,r,REG)
 VDFA(i,j,r) *# purchases of domestic i for use by j in region r #*;
**Update** (**all**,i,TRAD_COMM)(**all**,j,PROD_COMM)(**all**,r,REG)
 VDFA(i,j,r) = pfd(i,j,r) * qfd(i,j,r);
**Read**
 VDFA **from** **file** GTAPDATA **header** *"VDFA"*;

**Variable** (**all**,i,TRAD_COMM)(**all**,j,PROD_COMM)(**all**,s,REG)
 pfm(i,j,s) *# price index for imports of i by j in region s #*;
**Variable** (**orig_level**=VIFM)(**all**,i,TRAD_COMM)(**all**,j,PROD_COMM)(**all**,s,REG)
 qfm(i,j,s) *# demand for i by industry j in region s #*;
**Coefficient** (**ge** 0)(**all**,i,TRAD_COMM)(**all**,j,PROD_COMM)(**all**,r,REG)
 VIFA(i,j,r) *# purchases of imported i for use by j in region r #*;
**Update** (**all**,i,TRAD_COMM)(**all**,j,PROD_COMM)(**all**,r,REG)
 VIFA(i,j,r) = pfm(i,j,r) * qfm(i,j,r);
**Read**
 VIFA **from** **file** GTAPDATA **header** *"VIFA"*;

**Variable** (**all**,i,ENDWS_COMM)(**all**,j,PROD_COMM)(**all**,r,REG)
 pmes(i,j,r) *# market price of sluggish endowment i used by j in r #*;
**Coefficient** (**ge** 0)(**all**,i,ENDW_COMM)(**all**,j,PROD_COMM)(**all**,r,REG)
 VFM(i,j,r) *# producer expenditure on i by j in r valued at mkt prices #*;
**Update** (**all**,i,ENDWM_COMM)(**all**,j,PROD_COMM)(**all**,r,REG)
 VFM(i,j,r) = pm(i,r) * qfe(i,j,r);
**Update** (**all**,i,ENDWS_COMM)(**all**,j,PROD_COMM)(**all**,r,REG)
 VFM(i,j,r) = pmes(i,j,r) * qfe(i,j,r);
**Read**
 VFM **from** **file** GTAPDATA **header** *"VFM"*;

**Coefficient** (**ge** 0)(**all**,i,TRAD_COMM)(**all**,j,PROD_COMM)(**all**,r,REG)
 VIFM(i,j,r) *# purchases of imports i for use by j in region r #*;
**Update** (**all**,i,TRAD_COMM)(**all**,j,PROD_COMM)(**all**,r,REG)
 VIFM(i,j,r) = pim(i,r) * qfm(i,j,r);
**Read**
 VIFM **from** **file** GTAPDATA **header** *"VIFM"*;

**Coefficient** (**ge** 0)(**all**,i,TRAD_COMM)(**all**,j,PROD_COMM)(**all**,r,REG)
 VDFM(i,j,r) *# purchases of domestic i for use by j in region r #*;
**Update** (**all**,i,TRAD_COMM)(**all**,j,PROD_COMM)(**all**,r,REG)
 VDFM(i,j,r) = pm(i,r) * qfd(i,j,r);
**Read**
 VDFM **from** **file** GTAPDATA **header** *"VDFM"*;

*!<
 Global Bank
 -----------
>!*

**Variable** (**all**,r,REG)
 kb(r) *# beginning-of-period capital stock in r #*;
**Variable** (**all**,r,REG)
 pcgds(r) *# price of investment goods = ps("cgds",r) #*;
**Coefficient** (**ge** 0)(**all**,r,REG)
 VDEP(r) *# value of capital depeciation in r (exogenous) #*;
**Update** (**all**,r,REG)
 VDEP(r) = kb(r) * pcgds(r);
**Read**
 VDEP **from** **file** GTAPDATA **header** *"VDEP"*;
*!<
 Value of capital depreciation is used to compute the (exogenous)
 depreciation rate and therefore does not appear in update.
>!*

*!<
 International Trade and Transport
 ---------------------------------
>!*

**Variable** (**all**,i,TRAD_COMM)(**all**,r,REG)(**all**,s,REG)
 pms(i,r,s) *# domestic price for good i supplied from r to region s #*;
**Variable** (**orig_level**=VXMD)(**all**,i,TRAD_COMM)(**all**,r,REG)(**all**,s,REG)
 qxs(i,r,s) *# export sales of commodity i from r to region s #*;
**Coefficient** (**ge** 0)(**all**,i,TRAD_COMM)(**all**,r,REG)(**all**,s,REG)
 VIMS(i,r,s) *# imports of i from r to s valued at domestic mkt prices #*;
**Update** (**all**,i,TRAD_COMM)(**all**,r,REG)(**all**,s,REG)
 VIMS(i,r,s) = pms(i,r,s) * qxs(i,r,s);
**Read**
 VIMS **from** **file** GTAPDATA **header** *"VIMS"*;

**Variable** (**all**,i,TRAD_COMM)(**all**,r,REG)(**all**,s,REG)
 pcif(i,r,s) *# CIF world price of commodity i supplied from r to s #*;
**Coefficient** (**ge** 0)(**all**,i,TRAD_COMM)(**all**,r,REG)(**all**,s,REG)
 VIWS(i,r,s) *# imports of i from r to s valued CIF (tradeables only) #*;
**Update** (**all**,i,TRAD_COMM)(**all**,r,REG)(**all**,s,REG)
 VIWS(i,r,s) = pcif(i,r,s) * qxs(i,r,s);
**Read**
 VIWS **from** **file** GTAPDATA **header** *"VIWS"*;

**Variable** (**all**,i,TRAD_COMM)(**all**,r,REG)(**all**,s,REG)
 pfob(i,r,s) *# FOB world price of commodity i supplied from r to s #*;
**Coefficient** (**ge** 0)(**all**,i,TRAD_COMM)(**all**,r,REG)(**all**,s,REG)
 VXWD(i,r,s) *# exports of i from r to s valued FOB (tradeables only) #*;
**Update** (**all**,i,TRAD_COMM)(**all**,r,REG)(**all**,s,REG)
 VXWD(i,r,s) = pfob(i,r,s) * qxs(i,r,s);
**Read**
 VXWD **from** **file** GTAPDATA **header** *"VXWD"*;

**Coefficient** (**ge** 0)(**all**,i,TRAD_COMM)(**all**,r,REG)(**all**,s,REG)
 VXMD(i,r,s)
 *# exports of i from r to s valued at mkt prices (tradeables only) #*;
**Update** (**all**,i,TRAD_COMM)(**all**,r,REG)(**all**,s,REG)
 VXMD(i,r,s) = pm(i,r) * qxs(i,r,s);
**Read**
 VXMD **from** **file** GTAPDATA **header** *"VXMD"*;

**Variable** (**orig_level**=VST)(**all**,m,MARG_COMM)(**all**,r,REG)
 qst(m,r) *# sales of m from r to international transport #*;
**Coefficient** (**ge** 0)(**all**,m,MARG_COMM)(**all**,r,REG)
 VST(m,r)
 *# exprts of m from r for int'l trnsport valued at mkt p (tradeables only) #*;
**Update** (**all**,m,MARG_COMM)(**all**,r,REG)
 VST(m,r) = pm(m,r) * qst(m,r);
**Read**
 VST **from** **file** GTAPDATA **header** *"VST"*;

*!<
 ----------------
 Common VARIABLES
 ----------------

 Common variables are defined as variables which are used in more than one
 module. For example, the variable y(r) is used in the Goverment
 Consumption, Private Consumption, Firms, Regional Household and
 Investment, Global Bank and Savings modules. Appendices, e.g., Summary
 Indices, are not included in this definition.
>!*

**Variable** (**all**,r,REG)
 y(r) *# regional household income in region r #*;
**Variable** (**all**,r,REG)
 pop(r) *# regional population #*;
**Variable** (**all**,i,ENDWS_COMM)(**all**,j,PROD_COMM)(**all**,r,REG)
 qoes(i,j,r) *# supply of sluggish endowment i used by j in r #*;
**Variable** (**all**,i,ENDW_COMM)(**all**,r,REG)
 endwslack(i,r) *# slack variable in endowment market clearing condition #*;
*!<
 This is exogenous, unless the user wishes to employ a partial equilibrium
 closure in which the price of one or more of the primary factors is fixed.
>!*

**Variable** (**all**,r,REG)
 pgov(r) *# price index for gov't hhld expenditure in region r #*;
**Variable** (**all**,r,REG)
 yg(r)
 *# regional government consumption expenditure in region r #*;
**Variable** (**all**,r,REG)
 ug(r) *# per capita utility from gov't expend. in region r #*;
**Variable** (**all**,r,REG)
 ppriv(r)
 *# price index for private consumption expenditure in region r #*;
**Variable** (**all**,r,REG)
 uepriv(r)
 *# elasticity of cost wrt utility from private consumption #*;
**Variable** (**all**,r,REG)
 yp(r) *# regional private consumption expenditure in region r #*;
**Variable** (**all**,r,REG)
 up(r) *# per capita utility from private expend. in region r #*;
**Variable** (**all**,i,NSAV_COMM)(**all**,r,REG)
 **to**(i,r) *# output (or income) tax in region r #*;
*!<
 Note: It is important that the user NOT shock the tax on capital goods
 output, as this will cause an inconsistency in the update relationship for
 VOM(cgds).
>!*
**Variable** (**orig_level**=VIM)(**all**,i,TRAD_COMM)(**all**,s,REG)
 qim(i,s) *# aggregate imports of i in region s, market price weights #*;
**Variable**
 globalcgds *# global supply of capital goods for NET investment #*;
**Variable**
 pcgdswld *# world average price of capital goods (net investment weights) #*;

*!<
 The following variables could be dropped when converting to levels
 equation for income. They are only needed for the linearized equation.
 The idea here is to look at the ratio of taxes to income in order to
 preserve homogeneity in prices. (We could also look at changes in tax
 revenue, but then a uniform price increase would change this variable.)
 Obviously a simple percentage change variable doesn't work, since many
 taxes are initially zero. The basic logic of this approach is as follows:

 Let R be the ratio of taxes to income: R = T/Y, then:
 dR = d(T/Y) = R(t - y)/100
 multiply through by Y to get:
 YdR = dT - Ty/100
 This ratio change is computed for each tax type and for total taxes. Then
 the change in tax revenue itself may be computed as:
 dT = YdR + Ty/100
 in order to determine regional income.
>!*

**Variable** (**change**) (**all**,r,REG)
 del_taxrgc(r) *# change in ratio of government consumption tax to INCOME #*;
**Variable** (**change**) (**all**,r,REG)
 del_taxrpc(r) *# change in ratio of private consumption tax to INCOME #*;
**Variable** (**change**) (**all**,r,REG)
 del_taxriu(r) *# change in ratio of tax on intermediate usage to INCOME #*;
**Variable** (**change**) (**all**,r,REG)
 del_taxrfu(r) *# change in ratio of tax on primary factor usage to INCOME #*;
**Variable** (**change**) (**all**,r,REG)
 del_taxrout(r) *# change in ratio of output tax to INCOME #*;
**Variable** (**change**) (**all**,r,REG)
 del_taxrexp(r) *# change in ratio of export tax to INCOME #*;
**Variable** (**change**) (**all**,r,REG)
 del_taxrimp(r) *# change in ratio of import tax to INCOME #*;
**Variable** (**change**) (**all**,r,REG)
 del_taxrinc(r) *# change in ratio of income tax to INCOME #*;

*!<
 -------------------
 Common COEFFICIENTS
 -------------------

 Key Derivatives of the Base Data
 Regional Expenditure and Income
 Indirect Tax Receipts
 Miscellaneous Coefficients

 Common Coefficients are defined as coefficients which are used in more
 than one module. For example, ESUBD(i) is used in the Goverment
 Household, Private Household, and Firms modules.
>!*

*!<
 Key Derivatives of the Base Data
 --------------------------------
>!*

**Coefficient** (**all**,i,DEMD_COMM)(**all**,j,PROD_COMM)(**all**,r,REG)
 VFA(i,j,r) *# producer expenditure on i by j in r valued at agent's prices #*;
**Formula** (**all**,i,ENDW_COMM)(**all**,j,PROD_COMM)(**all**,r,REG)
 VFA(i,j,r) = EVFA(i,j,r);
**Formula** (**all**,i,TRAD_COMM)(**all**,j,PROD_COMM)(**all**,s,REG)
 VFA(i,j,s) = VDFA(i,j,s) + VIFA(i,j,s);

**Coefficient** (**all**,i,NSAV_COMM)(**all**,r,REG)
 VOA(i,r) *# value of commodity i output in region r at agent's prices #*;
**Formula** (**all**,i,ENDW_COMM)(**all**,r,REG)
 VOA(i,r) = EVOA(i,r);
**Formula** (**all**,i,PROD_COMM)(**all**,r,REG)
 VOA(i,r) = **sum**(j,DEMD_COMM, VFA(j,i,r));

**Coefficient** (**all**,i,TRAD_COMM)(**all**,r,REG)
 VDM(i,r) *# domestic sales of i in r at mkt prices (tradeables only) #*;
**Formula** (**all**,i,TRAD_COMM)(**all**,r,REG)
 VDM(i,r) = VDPM(i,r) + VDGM(i,r) + **sum**(j,PROD_COMM, VDFM(i,j,r));

**Coefficient** (**all**,i,NSAV_COMM)(**all**,r,REG)
 VOM(i,r) *# value of commodity i output in region r at market prices #*;
**Formula** (**all**,i,ENDW_COMM)(**all**,r,REG)
 VOM(i,r) = **sum**(j,PROD_COMM, VFM(i,j,r));
**Formula** (**all**,m,MARG_COMM)(**all**,r,REG)
 VOM(m,r) = VDM(m,r) + **sum**(s,REG, VXMD(m,r,s)) + VST(m,r);
**Formula** (**all**,i,NMRG_COMM)(**all**,r,REG)
 VOM(i,r) = VDM(i,r) + **sum**(s,REG, VXMD(i,r,s));
**Formula** (**all**,h,CGDS_COMM)(**all**,r,REG)
 VOM(h,r) = VOA(h,r);

*!<
 Regional Expenditure and Income
 -------------------------------

 Regional income is allocated between private consumption expenditure,
 government consumption expenditure, and saving.

 Expenditure of Regional Household
 .................................

 Regional household(h.h.)
 Expenditure = Income
 _/|\_
 _/ | \_
 _/ | \_
 _/ | \_
 _/ | \_
 Private h.h. | Government h.h.
 ( PRIVEXP ) | ( GOVEXP )
 _/\_ | _/\_
 _/ \_ | _/ \_
 / \ | / \
 Domestic Imported Savings Domestic Imported
 Goods Goods ( SAVE ) Goods Goods
 ( VDPA ) ( VIPA ) ( VDGA ) ( VIGA )

 Note: The coefficients at the ends of branches are
 Base Data, e.g., VDPA, SAVE.
>!*

*! government consumption expenditure, GOVEXP !*
**Coefficient** (**all**,i,TRAD_COMM)(**all**,r,REG)
 VGA(i,r) *# government consn expenditure on i in r at agent's prices #*;
**Formula** (**all**,i,TRAD_COMM)(**all**,s,REG)
 VGA(i,s) = VDGA(i,s) + VIGA(i,s);
**Coefficient** (**all**,r,REG)
 GOVEXP(r) *# government expenditure in region r #*;
**Formula** (**all**,r,REG)
 GOVEXP(r) = **sum**(i,TRAD_COMM, VGA(i,r));

*! private consumption expenditure, PRIVEXP !*
**Coefficient** (**all**,i,TRAD_COMM)(**all**,r,REG)
 VPA(i,r) *# private hhld expenditure on i in r valued at agent's prices #*;
**Formula** (**all**,i,TRAD_COMM)(**all**,s,REG)
 VPA(i,s) = VDPA(i,s) + VIPA(i,s);
**Coefficient** (**all**,r,REG)
 PRIVEXP(r) *# private consumption expenditure in region r #*;
**Formula** (**all**,r,REG)
 PRIVEXP(r) = **sum**(i,TRAD_COMM, VPA(i,r));

*! aggregate expenditure + saving = aggregate income !*
**Coefficient** (**all**,r,REG)
 INCOME(r) *# level of expenditure, which equals NET income in region r #*;
**Formula** (**all**,r,REG)
 INCOME(r) = PRIVEXP(r) + GOVEXP(r) + SAVE(r);

*!<
 Indirect Tax Receipts
 ---------------------
>!*

**Coefficient** (**all**,i,TRAD_COMM)(**all**,r,REG)
 DGTAX(i,r) *# tax on government consumption of domestic good i in region r #*;
**Formula** (**all**,i,TRAD_COMM)(**all**,r,REG)
 DGTAX(i,r) = VDGA(i,r) - VDGM(i,r);
**Coefficient** (**all**,i,TRAD_COMM)(**all**,r,REG)
 IGTAX(i,r) *# tax on government consumption of imported good i in region r #*;
**Formula** (**all**,i,TRAD_COMM)(**all**,r,REG)
 IGTAX(i,r) = VIGA(i,r) - VIGM(i,r);
**Coefficient** (**all**,r,REG)
 TGC(r) *# government consumption tax payments in r #*;
**Formula** (**all**,r,REG)
 TGC(r) = **sum**(i,TRAD_COMM, DGTAX(i,r) + IGTAX(i,r));

**Coefficient** (**all**,i,TRAD_COMM)(**all**,r,REG)
 DPTAX(i,r) *# tax on private consumption of domestic good i in region r #*;
**Formula** (**all**,i,TRAD_COMM)(**all**,r,REG)
 DPTAX(i,r) = VDPA(i,r) - VDPM(i,r);
**Coefficient** (**all**,i,TRAD_COMM)(**all**,r,REG)
 IPTAX(i,r) *# tax on private consumption of imported good i in region r #*;
**Formula** (**all**,i,TRAD_COMM)(**all**,r,REG)
 IPTAX(i,r) = VIPA(i,r) - VIPM(i,r);
**Coefficient** (**all**,r,REG)
 TPC(r) *# private consumption tax payments in r #*;
**Formula** (**all**,r,REG)
 TPC(r) = **sum**(i,TRAD_COMM, DPTAX(i,r) + IPTAX(i,r));

**Coefficient** (**all**,i,TRAD_COMM)(**all**,j,PROD_COMM)(**all**,r,REG)
 DFTAX(i,j,r) *# tax on use of domestic intermediate good i by j in r #*;
**Formula** (**all**,i,TRAD_COMM)(**all**,j,PROD_COMM)(**all**,r,REG)
 DFTAX(i,j,r) = VDFA(i,j,r) - VDFM(i,j,r);
**Coefficient** (**all**,i,TRAD_COMM)(**all**,j,PROD_COMM)(**all**,r,REG)
 IFTAX(i,j,r) *# tax on use of imported intermediate good i by j in r #*;
**Formula** (**all**,i,TRAD_COMM)(**all**,j,PROD_COMM)(**all**,r,REG)
 IFTAX(i,j,r) = VIFA(i,j,r) - VIFM(i,j,r);
**Coefficient** (**all**,r,REG)
 TIU(r) *# firms' tax payments on intermediate goods usage in r #*;
**Formula** (**all**,r,REG)
 TIU(r) = **sum**(i,TRAD_COMM, **sum**(j,PROD_COMM, DFTAX(i,j,r) + IFTAX(i,j,r)));

**Coefficient** (**all**,i,ENDW_COMM)(**all**,j,PROD_COMM)(**all**,r,REG)
 ETAX(i,j,r) *# tax on use of endowment good i by industry j in region r #*;
**Formula** (**all**,i,ENDW_COMM)(**all**,j,PROD_COMM)(**all**,r,REG)
 ETAX(i,j,r) = VFA(i,j,r) - VFM(i,j,r);
**Coefficient** (**all**,r,REG)
 TFU(r) *# firms' tax payments on primary factor usage in r #*;
**Formula** (**all**,r,REG)
 TFU(r) = **sum**(i,ENDW_COMM, **sum**(j,PROD_COMM, ETAX(i,j,r)));

**Coefficient** (**all**,i,NSAV_COMM)(**all**,r,REG)
 PTAX(i,r) *# output tax on good i in region r #*;
**Formula** (**all**,i,NSAV_COMM)(**all**,r,REG)
 PTAX(i,r) = VOM(i,r) - VOA(i,r);
**Coefficient** (**all**,r,REG)
 TOUT(r) *# production tax payments in r #*;
**Formula** (**all**,r,REG)
 TOUT(r) = **sum**(i,PROD_COMM, PTAX(i,r));

**Coefficient** (**all**,i,TRAD_COMM)(**all**,r,REG)(**all**,s,REG)
 XTAXD(i,r,s) *# tax on exports of good i from source r to destination s #*;
**Formula** (**all**,i,TRAD_COMM)(**all**,r,REG)(**all**,s,REG)
 XTAXD(i,r,s) = VXWD(i,r,s) - VXMD(i,r,s);
**Coefficient** (**all**,r,REG)
 TEX(r) *# export tax payments in r #*;
**Formula** (**all**,r,REG)
 TEX(r) = **sum**(i,TRAD_COMM, **sum**(s,REG, XTAXD(i,r,s)));

**Coefficient** (**all**,i,TRAD_COMM)(**all**,r,REG)(**all**,s,REG)
 MTAX(i,r,s) *# tax on imports of good i from source r in destination s #*;
**Formula** (**all**,i,TRAD_COMM)(**all**,r,REG)(**all**,s,REG)
 MTAX(i,r,s) = VIMS(i,r,s) - VIWS(i,r,s);
**Coefficient** (**all**,r,REG)
 TIM(r) *# import tax payments in r #*;
**Formula** (**all**,r,REG)
 TIM(r) = **sum**(i,TRAD_COMM, **sum**(s,REG, MTAX(i,s,r)));

*!<
 Miscellaneous Coefficients
 --------------------------
>!*

*! domestic/imported substitution elasticity !*
**Coefficient** (**parameter**)(**all**,i,TRAD_COMM)
 ESUBD(i)
 *# region-generic el. of sub. domestic/imported for all agents #*;
**Read**
 ESUBD **from** **file** GTAPPARM **header** *"ESBD"*;

*! net global investment expenditure !*
**Coefficient** (**all**,r,REG)
 REGINV(r) *# regional GROSS investment in r (value of "cgds" output) #*;
**Formula** (**all**,r,REG)
 REGINV(r) = **sum**(k,CGDS_COMM, VOA(k,r));
**Coefficient** (**all**,r,REG)
 NETINV(r) *# regional NET investment in region r #*;
**Formula** (**all**,r,REG)
 NETINV(r) = **sum**(k,CGDS_COMM, VOA(k,r)) - VDEP(r);
**Coefficient**
 GLOBINV *# global expenditures on net investment #*;
**Formula**
 GLOBINV = **sum**(r,REG, NETINV(r));

*! elasticity of cost wrt utility from private consumption !*
**Coefficient** (**all**,i,TRAD_COMM)(**all**,r,REG)
 CONSHR(i,r) *# share of private hhld consumption devoted to good i in r #*;
**Formula** (**all**,i,TRAD_COMM)(**all**,r,REG)
 CONSHR(i,r) = VPA(i,r) / **sum**(k,TRAD_COMM, VPA(k,r));
**Coefficient** (**parameter**)(**all**,i,TRAD_COMM)(**all**,r,REG)
 INCPAR(i,r)
 *# expansion parameter in the CDE minimum expenditure function #*;
**Read**
 INCPAR **from** **file** GTAPPARM **header** *"INCP"*;
**Coefficient** (**all**,r,REG)
 UELASPRIV(r)
 *# elasticity of cost wrt utility from private consumption #*;
**Formula** (**all**,r,REG)
 UELASPRIV(r) = **sum**(i,TRAD_COMM, CONSHR(i,r) * INCPAR(i,r));

*!<
 =======
 Modules
 =======

 1. Government Consumption
 2. Private Consumption
 3. Firms
 4. Investment, Global Bank, and Savings
 5. International Trade
 6. International Transport Services
 7. Regional Household
 8. Equilibrium Conditions
>!*

*!<
 -------------------------
 1. Government Consumption
 -------------------------

 1-0. Module-Specific Variables
 1-1. Demands for Composite Goods
 1-2. Composite Tradeables
>!*

*!<
 1-0. Module-Specific Variables
 ------------------------------

 only used in this Government Consumption module
>!*

**Variable** (**all**,i,TRAD_COMM)(**all**,r,REG)
 pg(i,r) *# government consumption price for commodity i in region r #*;
**Variable** (**all**,i,TRAD_COMM)(**all**,r,REG)
 qg(i,r) *# government hhld demand for commodity i in region r #*;

*!<
 1-1. Demands for Composite Goods
 --------------------------------
>!*

**Equation** GPRICEINDEX
*# definition of price index for aggregate gov't purchases (HT 40) #*
(**all**,r,REG)
 pgov(r) = **sum**(i,TRAD_COMM, **[**VGA(i,r) / GOVEXP(r)**]** * pg(i,r));

**Equation** GOVDMNDS
*# government consumption demands for composite commodities (HT 41) #*
(**all**,i,TRAD_COMM)(**all**,r,REG)
 qg(i,r) - pop(r) = ug(r) - **[**pg(i,r) - pgov(r)**]**;

**Equation** GOVU
*# utility from government consumption in r #*
(**all**,r,REG)
 yg(r) - pop(r) = pgov(r) + ug(r);

*!<
 1-2. Composite Tradeables
 -------------------------
>!*

**Variable** (**all**,i,TRAD_COMM)(**all**,r,REG)
 tgd(i,r) *# tax on domestic i purchased by government hhld in r #*;

**Variable** (**all**,i,TRAD_COMM)(**all**,r,REG)
 tgm(i,r) *# tax on imported i purchased by gov't hhld in r #*;

**Equation** GHHDPRICE
*# eq'n links domestic market and government consumption prices (HT 19) #*
(**all**,i,TRAD_COMM)(**all**,r,REG)
 pgd(i,r) = tgd(i,r) + pm(i,r);

**Equation** GHHIPRICES
*# eq'n links domestic market and government consumption prices (HT 22) #*
(**all**,i,TRAD_COMM)(**all**,r,REG)
 pgm(i,r) = tgm(i,r) + pim(i,r);

**Coefficient** (**all**,i,TRAD_COMM)(**all**,s,REG)
 GMSHR(i,s) *# share of imports for gov't hhld at agent's prices #*;
**Formula** (**all**,i,TRAD_COMM)(**all**,s,REG)
 GMSHR(i,s) = VIGA(i,s) / VGA(i,s);

**Equation** GCOMPRICE
*# government consumption price for composite commodities (HT 42) #*
(**all**,i,TRAD_COMM)(**all**,s,REG)
 pg(i,s) = GMSHR(i,s) * pgm(i,s) + **[**1 - GMSHR(i,s)**]** * pgd(i,s);

**Equation** GHHLDAGRIMP
*# government consumption demand for aggregate imports (HT 43) #*
(**all**,i,TRAD_COMM)(**all**,s,REG)
 qgm(i,s) = qg(i,s) + ESUBD(i) * **[**pg(i,s) - pgm(i,s)**]**;

**Equation** GHHLDDOM
*# government consumption demand for domestic goods (HT 44) #*
(**all**,i,TRAD_COMM)(**all**,s,REG)
 qgd(i,s) = qg(i,s) + ESUBD(i) * **[**pg(i,s) - pgd(i,s)**]**;

**Equation** TGCRATIO
*# change in ratio of government consumption tax payments to regional income #*
(**all**,r,REG)
 100.0 * INCOME(r) * del_taxrgc(r) + TGC(r) * y(r)
 = **sum**(i,TRAD_COMM,
 VDGA(i,r) * tgd(i,r) + DGTAX(i,r) * **[**pm(i,r) + qgd(i,r)**]**)
 + **sum**(i,TRAD_COMM,
 VIGA(i,r) * tgm(i,r) + IGTAX(i,r) * **[**pim(i,r) + qgm(i,r)**]**);

*!<
 -----------------------------
 2. Private Consumption Module
 -----------------------------

 2-0. Module-Specific Variables
 2-1. Utility from Private Consumption
 2-2. Allen Partials, Price and Income Elasticities, Composite Demand
 2-3. Composite Tradeables
>!*

*!<
 2-0. Module-Specific Variables
 ------------------------------

 only used in this Private Consumption module
>!*

**Variable** (**all**,i,TRAD_COMM)(**all**,r,REG)
 pp(i,r) *# private consumption price for commodity i in region r #*;
**Variable** (**all**,i,TRAD_COMM)(**all**,r,REG)
 qp(i,r) *# private hhld demand for commodity i in region r #*;

*!<
 2-1. Utility from Private Consumption
 -------------------------------------
>!*

**Equation** PHHLDINDEX
*# price index for private consumption expenditure #*
(**all**,r,REG)
 ppriv(r) = **sum**(i,TRAD_COMM, CONSHR(i,r) * pp(i,r));

**Equation** PRIVATEU
*# computation of utility from private consumption in r (HT 45) #*
(**all**,r,REG)
 yp(r) - pop(r) = ppriv(r) + UELASPRIV(r) * up(r);
*!<
 This equation determines private consumption utility for a representative
 household in region r, based on the per capita private expenditure
 function. (HT 45)
>!*

**Coefficient** (**all**,i,TRAD_COMM)(**all**,r,REG)
 XWCONSHR(i,r)
 *# expansion-parameter-weighted consumption share #*;
**Formula** (**all**,i,TRAD_COMM)(**all**,r,REG)
 XWCONSHR(i,r) = CONSHR(i,r) * INCPAR(i,r) / UELASPRIV(r);

**Equation** UTILELASPRIV
*# elasticity of expenditure wrt utility from private consumption #*
(**all**,r,REG)
 uepriv(r)
 = **sum**(i,TRAD_COMM, XWCONSHR(i,r) * **[**pp(i,r) + qp(i,r) - yp(r)**]**);

*!<
 2-2. Allen Partials, Price and Income Elasticities, Composite Demand
 --------------------------------------------------------------------
>!*

**Coefficient** (**parameter**)(**all**,i,TRAD_COMM)(**all**,r,REG)
 SUBPAR(i,r)
 *# substitution parameter in CDE minimum expenditure function #*;
**Read**
 SUBPAR **from** **file** GTAPPARM **header** *"SUBP"*;

*!<
 (HT F1 - F3)
>!*
**Coefficient** (**all**,i,TRAD_COMM)(**all**,r,REG)
 ALPHA(i,r) *# 1 - sub. parameter in the CDE minimum expenditure function #*;
**Formula** (**all**,i,TRAD_COMM)(**all**,r,REG)
 ALPHA(i,r) = 1 - SUBPAR(i,r);

**Coefficient** (**all**,i,TRAD_COMM)(**all**,k,TRAD_COMM)(**all**,r,REG)
 APE(i,k,r) *# Allen partial elst. of sub. between composite i and k in r #*;
**Formula** (**all**,i,TRAD_COMM)(**all**,k,TRAD_COMM)(**all**,r,REG)
 APE(i,k,r)
 = ALPHA(i,r) + ALPHA(k,r) - **sum**(n,TRAD_COMM, CONSHR(n,r) * ALPHA(n,r));
**Formula** (**all**,i,TRAD_COMM)(**all**,r,REG)
 APE(i,i,r)
 = 2.0 * ALPHA(i,r)
 - **sum**(n,TRAD_COMM, CONSHR(n,r) * ALPHA(n,r))
 - ALPHA(i,r) / CONSHR(i,r);

**Coefficient** (**all**,i,TRAD_COMM)(**all**,r,REG)
 EY(i,r) *# income elast. of private hhld demand for i in r (HT F4) #*;
**Formula** (**all**,i,TRAD_COMM)(**all**,r,REG)
 EY(i,r)
 = **[**1.0 / **sum**(n,TRAD_COMM, CONSHR(n,r) * INCPAR(n,r))**]**
 * **[**INCPAR(i,r) * **[**1.0 - ALPHA(i,r)**]**
 + **sum**(n,TRAD_COMM, CONSHR(n,r) * INCPAR(n,r) * ALPHA(n,r))**]**
 + **[**ALPHA(i,r) - **sum**(n,TRAD_COMM, CONSHR(n,r) * ALPHA(n,r))**]**;

**Coefficient** (**all**,i,TRAD_COMM)(**all**,k,TRAD_COMM)(**all**,r,REG)
 EP(i,k,r)
 *# uncomp. elast. of private hhld demand for i wrt price of k in r (HT F5) #*;
**Formula** (**all**,i,TRAD_COMM)(**all**,k,TRAD_COMM)(**all**,r,REG)
 EP(i,k,r) = 0;
**Formula** (**all**,i,TRAD_COMM)(**all**,k,TRAD_COMM)(**all**,r,REG)
 EP(i,k,r) = **[**APE(i,k,r) - EY(i,r)**]** * CONSHR(k,r);

**Equation** PRIVDMNDS
*# private consumption demands for composite commodities (HT 46) #*
(**all**,i,TRAD_COMM)(**all**,r,REG)
 qp(i,r) - pop(r)
 = **sum**(k,TRAD_COMM, EP(i,k,r) * pp(k,r)) + EY(i,r) * **[**yp(r) - pop(r)**]**;
*!<
 Private consumption demands for composite commodities. Demand system is
 on a per capita basis. Here, yp(r) - pop(r) is % change in per capita
 income. (HT 46)
>!*

*!<
 2-3. Composite Tradeables
 -------------------------
>!*

**Variable** (**all**,r,REG)
 tp(r) *# comm.-, source-gen. shift in tax on private cons. #*;
*!<
 The variable tp(r) can be swapped with del_ttaxr(r) in order to generate a
 tax replacement scenario, whereby taxes remain a constant share of
 national income.
>!*

**Coefficient** (**all**,i,TRAD_COMM)(**all**,r,REG) LevTPD(i,r) *# levels TPD #*;
**Zerodivide** **default** 1;
**Formula** (**all**,i,TRAD_COMM)(**all**,r,REG) LevTPD(i,r) = VDPA(i,r)/VDPM(i,r);
**Zerodivide** **off**;
**Variable** (**orig_level**=LevTPD)(**all**,i,TRAD_COMM)(**all**,r,REG)
 tpd(i,r) *# comm.-, source-spec. shift in tax on private cons. of dom. #*;
**Variable** (**all**,i,TRAD_COMM)(**all**,r,REG)
 atpd(i,r) *# power of tax on domestic i purchased by private hhld in r #*;
**Equation** TPDSHIFT
*# permits uniform consumption tax change #*
(**all**,i,TRAD_COMM)(**all**,r,REG)
 atpd(i,r) = tpd(i,r) + tp(r);

**Equation** PHHDPRICE
*# eq'n links domestic market and private consumption prices (HT 18) #*
(**all**,i,TRAD_COMM)(**all**,r,REG)
 ppd(i,r) = atpd(i,r) + pm(i,r);

**Variable** (**all**,i,TRAD_COMM)(**all**,r,REG)
 tpm(i,r) *# comm.-, source-spec. shift in tax on private cons. of imp. #*;
**Variable** (**all**,i,TRAD_COMM)(**all**,r,REG)
 atpm(i,r) *# power of tax on imported i purchased by private hhld in r #*;
**Equation** TPMSHIFT
*# permits uniform consumption tax change #*
(**all**,i,TRAD_COMM)(**all**,r,REG)
 atpm(i,r) = tpm(i,r) + tp(r);

**Equation** PHHIPRICES
*# eq'n links domestic market and private consumption prices (HT 21) #*
(**all**,i,TRAD_COMM)(**all**,r,REG)
 ppm(i,r) = atpm(i,r) + pim(i,r);

**Equation** TPCRATIO
*# change in ratio of private consumption tax payments to regional income #*
(**all**,r,REG)
 100.0 * INCOME(r) * del_taxrpc(r) + TPC(r) * y(r)
 = **sum**(i,TRAD_COMM,
 VDPA(i,r) * atpd(i,r) + DPTAX(i,r) * **[**pm(i,r) + qpd(i,r)**]**)
 + **sum**(i,TRAD_COMM,
 VIPA(i,r) * atpm(i,r) + IPTAX(i,r) * **[**pim(i,r) + qpm(i,r)**]**);

**Coefficient** (**all**,i,TRAD_COMM)(**all**,s,REG)
 PMSHR(i,s) *# share of imports for priv hhld at agent's prices #*;
**Formula** (**all**,i,TRAD_COMM)(**all**,s,REG)
 PMSHR(i,s) = VIPA(i,s) / VPA(i,s);

**Equation** PCOMPRICE
*# private consumption price for composite commodities (HT 47) #*
(**all**,i,TRAD_COMM)(**all**,s,REG)
 pp(i,s) = PMSHR(i,s) * ppm(i,s) + **[**1 - PMSHR(i,s)**]** * ppd(i,s);

**Equation** PHHLDDOM
*# private consumption demand for domestic goods (HT 48) #*
(**all**,i,TRAD_COMM)(**all**,s,REG)
 qpd(i,s) = qp(i,s) + ESUBD(i) * **[**pp(i,s) - ppd(i,s)**]**;

**Equation** PHHLDAGRIMP
*# private consumption demand for aggregate imports (HT 49) #*
(**all**,i,TRAD_COMM)(**all**,s,REG)
 qpm(i,s) = qp(i,s) + ESUBD(i) * **[**pp(i,s) - ppm(i,s)**]**;

*!<
 ---------
 3. Firms
 ---------

 We now turn to the behavioral equations for firms. The following picture
 describes factor demands. The first set of equations describe demands for
 primary factors. (See table 4 of Hertel and Tsigas.)

 Production structure
 --------------------

 qo(j,r) [ao(j,r)]
 /\
 / \ <----- CES
 / \
 / \
 / \
 [ava(j,r)] qva(j,r) qf(i,j,r) [af(i,j,r)]
 /|\ /\
 CES -----> / | \ / \ <------ CES
 / | \ / \
 / | \ / \
 / | \ / \
 Land Labor Capital Domestic Foreign
 qfe(i,j,r) qfd(i,j,r) qfm(i,j,r)
 [afe(i,j,r)]

 3-0. Module-Specific Variables
 3-1. Total Output Nest
 3-2. Composite Intermediates Nest
 3-3. Value-Added Nest
 3-4. Zero Profits Equations
>!*

*!<
 3-0. Module-Specific Variables
 ------------------------------

 only used in this Firms module or the Summary Indices or Welfare
 appendices
>!*

**Variable** (**all**,j,PROD_COMM)(**all**,r,REG)
 pva(j,r) *# firms' price of value added in industry j of region r #*;
**Variable** (**all**,j,PROD_COMM)(**all**,r,REG)
 qva(j,r) *# value added in industry j of region r #*;
**Variable** (**all**,i,TRAD_COMM)(**all**,j,PROD_COMM)(**all**,r,REG)
 pf(i,j,r) *# firms' price for commodity i for use by j in r #*;
**Variable** (**all**,i,TRAD_COMM)(**all**,j,PROD_COMM)(**all**,r,REG)
 qf(i,j,r) *# demand for commodity i for use by j in region r #*;
**Variable** (**all**,j,PROD_COMM)(**all**,r,REG)
 ao(j,r) *# output augmenting technical change in sector j of r #*;
**Variable** (**all**,i,PROD_COMM)(**all**,r,REG)
 ava(i,r) *# value added augmenting tech change in sector i of r #*;
**Variable** (**all**,i,TRAD_COMM)(**all**,j,PROD_COMM)(**all**,r,REG)
 af(i,j,r) *# composite intermed. input i augmenting tech change by j of r #*;
**Variable** (**all**,i,ENDW_COMM)(**all**,j,PROD_COMM)(**all**,r,REG)
 afe(i,j,r) *# primary factor i augmenting tech change by j of r #*;
**Variable** (**all**,i,TRAD_COMM)(**all**,r,REG)(**all**,s,REG)
 ams(i,r,s) *# import i from region r augmenting tech change in region s #*;

*!<
 3-1. Total Output Nest
 ----------------------
>!*

**Variable** (**all**,j,PROD_COMM)
 aosec(j) *# output tech change of sector j, worldwide #*;
**Variable** (**all**,r,REG)
 aoreg(r) *# output tech change in region r #*;
**Variable** (**all**,j,PROD_COMM)(**all**,r,REG)
 aoall(j,r) *# output augmenting technical change in sector j of r #*;
**Equation** AOWORLD
*# sector/region specific average rate of output augmenting tech change #*
(**all**,j,PROD_COMM)(**all**,r,REG)
 ao(j,r) = aosec(j) + aoreg(r) + aoall(j,r);

**Variable** (**all**,j,PROD_COMM)
 avasec(j) *# value added tech change of sector j, worldwide #*;
**Variable** (**all**,r,REG)
 avareg(r) *# value added tech change in region r #*;
**Variable** (**all**,j,PROD_COMM)(**all**,r,REG)
 avaall(j,r) *# value added augmenting technical change in sector j of r #*;
**Equation** AVAWORLD
*# sector/region specific average rate of value added augmenting tech change #*
(**all**,j,PROD_COMM)(**all**,r,REG)
 ava(j,r) = avasec(j) + avareg(r) + avaall(j,r);

**Coefficient** (**parameter**)(**all**,j,PROD_COMM)
 ESUBT(j)
 *# elst. of sub. among composite intermediate inputs in production #*;
**Read**
 ESUBT **from** **file** GTAPPARM **header** *"ESBT"*;

**Equation** VADEMAND
*# sector demands for primary factor composite #*
(**all**,j,PROD_COMM)(**all**,r,REG)
 qva(j,r)
 = -ava(j,r) + qo(j,r) - ao(j,r)
 - ESUBT(j) * **[**pva(j,r) - ava(j,r) - ps(j,r) - ao(j,r)**]**;
*!<
 Sector demands for primary factor composite. This equation differs from
 HT 35 due to the presence of intermediate input substitution.
>!*

**Variable** (**all**,i,TRAD_COMM)
 afcom(i) *# intermediate tech change of input i, worldwide #*;
**Variable** (**all**,j,PROD_COMM)
 afsec(j) *# intermediate tech change of sector j, worldwide #*;
**Variable** (**all**,r,REG)
 afreg(r) *# intermediate tech change in region r #*;
**Variable** (**all**,i,TRAD_COMM)(**all**,j,PROD_COMM)(**all**,r,REG)
 afall(i,j,r) *# intermediate input i augmenting tech change by j in r #*;
**Equation** AFWORLD
*# sector/region specific average rate of intermediates augmenting tech change #*
(**all**,i,TRAD_COMM)(**all**,j,PROD_COMM)(**all**,r,REG)
 af(i,j,r) = afcom(i) + afsec(j) + afreg(r) + afall(i,j,r);

**Equation** INTDEMAND
*# industry demands for intermediate inputs, including cgds #*
(**all**,i,TRAD_COMM)(**all**,j,PROD_COMM)(**all**,r,REG)
 qf(i,j,r)
 = - af(i,j,r) + qo(j,r) - ao(j,r)
 - ESUBT(j) * **[**pf(i,j,r) - af(i,j,r) - ps(j,r) - ao(j,r)**]**;
*!<
 Industry demands for intermediate inputs, including cgds. This equation
 differs from HT 36 due to the presence of intermediate input substitution.
>!*

*!<
 3-2. Composite Intermediates Nest
 ---------------------------------
>!*

**Variable** (**all**,i,TRAD_COMM)(**all**,j,PROD_COMM)(**all**,r,REG)
 tfd(i,j,r) *# tax on domestic i purchased by j in r #*;
**Equation** DMNDDPRICE
*# eq'n links domestic market and firm prices (HT 20) #*
(**all**,i,TRAD_COMM)(**all**,j,PROD_COMM)(**all**,r,REG)
 pfd(i,j,r) = tfd(i,j,r) + pm(i,r);
*!<
 This equation links domestic market and firm prices. It holds only for
 domestic goods and it captures the effect of commodity taxation of firms.
 (HT 20)
>!*

**Variable** (**all**,i,TRAD_COMM)(**all**,j,PROD_COMM)(**all**,r,REG)
 tfm(i,j,r) *# tax on imported i purchased by j in r #*;
**Equation** DMNDIPRICES
*# eq'n links domestic market and firm prices (HT 23) #*
(**all**,i,TRAD_COMM)(**all**,j,PROD_COMM)(**all**,r,REG)
 pfm(i,j,r) = tfm(i,j,r) + pim(i,r);
*!<
 This equation links domestic market and firm prices. It holds only for
 imported goods and it captures the effect of commodity taxation of firms.
 (HT 23)
>!*

**Equation** TIURATIO
*# change in ratio of tax payments on intermediate goods to regional income #*
(**all**,r,REG)
 100.0 * INCOME(r) * del_taxriu(r) + TIU(r) * y(r)
 = **sum**(i,TRAD_COMM, **sum**(j,PROD_COMM,
 VDFA(i,j,r) * tfd(i,j,r) + DFTAX(i,j,r) * **[**pm(i,r) + qfd(i,j,r)**]**))
 + **sum**(i,TRAD_COMM, **sum**(j,PROD_COMM,
 VIFA(i,j,r) * tfm(i,j,r) + IFTAX(i,j,r) * **[**pim(i,r) + qfm(i,j,r)**]**));

**Coefficient** (**all**,i,TRAD_COMM)(**all**,j,PROD_COMM)(**all**,s,REG)
 FMSHR(i,j,s) *# share of firms' imports in dom. composite, agent's prices #*;
**Zerodivide** **default** 0.5;
**Formula** (**all**,i,TRAD_COMM)(**all**,j,PROD_COMM)(**all**,s,REG)
 FMSHR(i,j,s) = VIFA(i,j,s) / VFA(i,j,s);
**Zerodivide** **off**;
**Equation** ICOMPRICE
*# industry price for composite commodities (HT 30) #*
(**all**,i,TRAD_COMM)(**all**,j,PROD_COMM)(**all**,r,REG)
 pf(i,j,r) = FMSHR(i,j,r) * pfm(i,j,r) + **[**1 - FMSHR(i,j,r)**]** * pfd(i,j,r);

**Equation** INDIMP
*# industry j demands for composite import i (HT 31) #*
(**all**,i,TRAD_COMM)(**all**,j,PROD_COMM)(**all**,s,REG)
 qfm(i,j,s) = qf(i,j,s) - ESUBD(i) * **[**pfm(i,j,s) - pf(i,j,s)**]**;

**Equation** INDDOM
*# industry j demands for domestic good i (HT 32) #*
(**all**,i,TRAD_COMM)(**all**,j,PROD_COMM)(**all**,s,REG)
 qfd(i,j,s) = qf(i,j,s) - ESUBD(i) * **[**pfd(i,j,s) - pf(i,j,s)**]**;

*!<
 3-3. Value-Added Nest
 ---------------------
>!*

**Variable** (**all**,i,ENDW_COMM)(**all**,j,PROD_COMM)(**all**,r,REG)
 tf(i,j,r) *# tax on primary factor i used by j in region r #*;

**Equation** MPFACTPRICE
*# eq'n links domestic and firm demand prices (HT 16) #*
(**all**,i,ENDWM_COMM)(**all**,j,PROD_COMM)(**all**,r,REG)
 pfe(i,j,r) = tf(i,j,r) + pm(i,r);

**Equation** SPFACTPRICE
*# eq'n links domestic and firm demand prices (HT 17) #*
(**all**,i,ENDWS_COMM)(**all**,j,PROD_COMM)(**all**,r,REG)
 pfe(i,j,r) = tf(i,j,r) + pmes(i,j,r);

**Variable** (**all**,i,ENDW_COMM)
 afecom(i) *# factor input tech change of input i, worldwide #*;
**Variable** (**all**,j,PROD_COMM)
 afesec(j) *# factor input tech change of sector j, worldwide #*;
**Variable** (**all**,r,REG)
 afereg(r) *# factor input tech change in region r #*;
**Variable** (**all**,i,ENDW_COMM)(**all**,j,PROD_COMM)(**all**,r,REG)
 afeall(i,j,r) *# primary factor i augmenting tech change sector j in r #*;
**Equation** AFEWORLD
*# sector/region specific average rate of prim. factor i augmenting tech change #*
(**all**,i,ENDW_COMM)(**all**,j,PROD_COMM)(**all**,r,REG)
 afe(i,j,r) = afecom(i) + afesec(j) + afereg(r) + afeall(i,j,r);

**Coefficient** (**all**,j,PROD_COMM)(**all**,r,REG)
 VVA(j,r) *# value added in activity j in region r #*;
**Formula** (**all**,j,PROD_COMM)(**all**,r,REG)
 VVA(j,r) = **sum**(i,ENDW_COMM, VFA(i,j,r));
**Coefficient** (**all**,i,ENDW_COMM)
 SVADEFAULT(i) *#zerodivide default for SVA#*;
**Formula** (**all**,i,ENDW_COMM)
 SVADEFAULT(i)
 = **sum**(j,PROD_COMM, **sum**(r,REG, VFA(i,j,r)))
 / **sum**(j,PROD_COMM, **sum**(r,REG, VVA(j,r)));
**Coefficient** (**all**,i,ENDW_COMM)(**all**,j,PROD_COMM)(**all**,r,REG)
 SVA(i,j,r) *# share of i in total value added in j in r #*;
**Formula** (**all**,i,ENDW_COMM)(**all**,j,PROD_COMM)(**all**,r,REG: VVA(j,r) <> 0)
 SVA(i,j,r) = VFA(i,j,r) / VVA(j,r);
**Formula** (**all**,i,ENDW_COMM)(**all**,j,PROD_COMM)(**all**,r,REG: VVA(j,r) = 0)
 SVA(i,j,r) = SVADEFAULT(i);
**Equation** VAPRICE
*# effective price of primary factor composite in each sector/region (HT 33) #*
(**all**,j,PROD_COMM)(**all**,r,REG)
 pva(j,r) = **sum**(k,ENDW_COMM, SVA(k,j,r) * **[**pfe(k,j,r) - afe(k,j,r)**]**);

**Equation** TFURATIO
*# change in ratio of tax payments on factor usage to regional income #*
(**all**,r,REG)
 100.0 * INCOME(r) * del_taxrfu(r) + TFU(r) * y(r)
 = **sum**(i,ENDWM_COMM, **sum**(j,PROD_COMM,
 VFA(i,j,r) * tf(i,j,r) + ETAX(i,j,r) * **[**pm(i,r) + qfe(i,j,r)**]**))
 + **sum**(i,ENDWS_COMM, **sum**(j,PROD_COMM,
 VFA(i,j,r) * tf(i,j,r) + ETAX(i,j,r) * **[**pmes(i,j,r) + qfe(i,j,r)**]**));

**Coefficient** (**parameter**)(**all**,j,PROD_COMM)
 ESUBVA(j)
 *# elst. of sub. capital/labor/land, in production of value added in j #*;
**Read**
 ESUBVA **from** **file** GTAPPARM **header** *"ESBV"*;

**Equation** ENDWDEMAND
*# demands for endowment commodities (HT 34) #*
(**all**,i,ENDW_COMM)(**all**,j,PROD_COMM)(**all**,r,REG)
 qfe(i,j,r)
 = - afe(i,j,r) + qva(j,r)
 - ESUBVA(j) * **[**pfe(i,j,r) - afe(i,j,r) - pva(j,r)**]**;

*!<
 3-4. Zero Profits Equations
 ---------------------------
>!*

**Equation** OUTPUTPRICES
*# eq'n links pre- and post-tax supply prices for all industries (HT 15) #*
(**all**,i,PROD_COMM)(**all**,r,REG)
 ps(i,r) = **to**(i,r) + pm(i,r);
*!<
 This equation links pre- and post-tax supply prices for all industries.
 This captures the effect of output taxes. TO(i,r) < 1 in the case of a
 tax. (HT 15)
>!*

**Equation** TOUTRATIO
*# change in ratio of output tax payments to regional income #*
(**all**,r,REG)
 100.0 * INCOME(r) * del_taxrout(r) + TOUT(r) * y(r)
 = **sum**(i,PROD_COMM,
 VOA(i,r) * **[**-**to**(i,r)**]** + PTAX(i,r) * **[**pm(i,r) + qo(i,r)**]**);

**Variable** (**all**,j,PROD_COMM)(**all**,r,REG)
 profitslack(j,r) *# slack variable in the zero profit equation #*;
*!<
 This is exogenous, unless the user wishes to specify output in a given
 region exogenously.
>!*
**Coefficient** (**all**,i,DEMD_COMM)(**all**,j,PROD_COMM)(**all**,r,REG)
 STC(i,j,r) *# share of i in total costs of j in r #*;
**Formula** (**all**,i,DEMD_COMM)(**all**,j,PROD_COMM)(**all**,r,REG)
 STC(i,j,r) = VFA(i,j,r) / **sum**(k,DEMD_COMM, VFA(k,j,r));

**Equation** ZEROPROFITS
*# industry zero pure profits condition (HT 6) #*
(**all**,j,PROD_COMM)(**all**,r,REG)
 ps(j,r) + ao(j,r)
 = **sum**(i,ENDW_COMM, STC(i,j,r) * **[**pfe(i,j,r) - afe(i,j,r) - ava(j,r)**]**)
 + **sum**(i,TRAD_COMM, STC(i,j,r) * **[**pf(i,j,r) - af(i,j,r)**]**)
 + profitslack(j,r);
*!<
 Industry zero pure profits condition (HT 6). This condition permits us to
 determine the endogenous output level for each of the non-endowment
 sectors, excepting when profitslack is itself endogenous. The level of
 activity in the endowment sectors is exogenously determined.
>!*

*!<
 ---------------------------------------
 4. Investment, Global Bank, and Savings
 ---------------------------------------

 Capital stock and rate of return equations follow. They correspond to the
 Investment Equations of Table 8 in Hertel and Tsigas.

 4-0. Module-Specific Variables
 4-1. Equations of Notational Convenience
 4-2. Rate of Return Equations
 4-3. Capital Accumulation
 4-4. Global Bank
 4-5. Price Index of Aggregate Global Composite Capital Goods
 4-6. Price of Saving
>!*

*!<
 4-0. Module-Specific Variables
 ------------------------------

 only used in this Investment, Global Bank and Savings module
>!*

**Variable** (**all**,r,REG)
 rental(r) *# rental rate on capital = ps("capital",r) #*;
**Variable** (**all**,r,REG)
 ke(r) *# end-of-period capital stock in r #*;
**Variable** (**all**,r,REG)
 rore(r) *# expected net rate of return on capital stock in r #*;
**Variable** (**all**,r,REG)
 rorc(r) *# current net rate of return on capital stock in r #*;
**Variable** (**all**,r,REG)
 qcgds(r) *# output of capital goods sector = qo("cgds",r) #*;

*!<
 4-1. Equations of Notational Convenience
 ----------------------------------------
>!*

**Variable** (**all**,r,REG)
 ksvces(r) *# capital services = qo("capital",r) #*;
**Equation** KAPSVCES
*# eq'n defines a variable for capital services (HT 52) #*
(**all**,r,REG)
 ksvces(r)
 = **sum**(h,ENDWC_COMM, **[**VOA(h,r) / **sum**(k,ENDWC_COMM, VOA(k,r))**]** * qo(h,r));
*!<
 This equation defines a variable for capital services, for convenience.
 (There is really only one capital services item.) (HT 52)
>!*

**Equation** KAPRENTAL
*# eq'n defines a variable for capital rental rate (HT 53) #*
(**all**,r,REG)
 rental(r)
 = **sum**(h,ENDWC_COMM, **[**VOA(h,r) / **sum**(k,ENDWC_COMM, VOA(k,r))**]** * ps(h,r));

**Equation** CAPGOODS
*# eq'n defines a variable for gross investment (HT 54) #*
(**all**,r,REG)
 qcgds(r)
 = **sum**(h,CGDS_COMM, **[**VOA(h,r) / REGINV(r)**]** * qo(h,r));
*!<
 This equation defines a variable for gross investment, for convenience.
 There is really only one capital goods item.
>!*

**Equation** PRCGOODS
*# eq'n defines the price of cgds (HT 55) #*
(**all**,r,REG)
 pcgds(r) = **sum**(h,CGDS_COMM, **[**VOA(h,r) / REGINV(r)**]** * ps(h,r));

**Equation** KBEGINNING
*# associates change in cap. services w/ change in cap. stock (HT 56) #*
(**all**,r,REG)
 kb(r) = ksvces(r);
*!<
 This equation associates any change in capital services during the period
 with a change in capital stock. Full capacity utilization is assumed.
>!*

**Coefficient** (**ge** 0)(**all**,r,REG)
 VKB(r) *# value of beginning-of-period capital stock in region r #*;
**Update** (**all**,r,REG)
 VKB(r) = pcgds(r) * kb(r);
**Read**
 VKB **from** **file** GTAPDATA **header** *"VKB"*;
*!<
 VKB(r) is used only in this sub-module, so its data are read here. The
 associated variables, pcgds(r) and kb(r), are used across modules, so they
 have been defined as common variables.
>!*

**Coefficient** (**all**,r,REG)
 INVKERATIO(r)
 *# ratio of gross investment to end-of-period capital stock in r #*;
**Formula** (**all**,r,REG)
 INVKERATIO(r) = REGINV(r) / **[**VKB(r) + NETINV(r)**]**;

**Equation** KEND
*# Ending capital stock equals beginning stock plus net investment. (HT 10) #*
(**all**,r,REG)
 ke(r) = INVKERATIO(r) * qcgds(r) + **[**1.0 - INVKERATIO(r)**]** * kb(r);

*!<
 4-2. Rate of Return Equations
 -----------------------------
>!*

**Coefficient** (**all**,r,REG)
 GRNETRATIO(r) *# ratio of GROSS/NET rates of return on capital in r #*;
**Formula** (**all**,r,REG)
 GRNETRATIO(r)
 = **sum**(h,ENDWC_COMM, VOA(h,r))
 / **[sum**(h,ENDWC_COMM, VOA(h,r)) - VDEP(r)**]**;
*!<
 NOTE: VOA("capital",r) is GROSS returns to capital.
>!*
**Equation** RORCURRENT
*# current rate of return on capital in region r (HT 57) #*
(**all**,r,REG)
 rorc(r) = GRNETRATIO(r) * **[**rental(r) - pcgds(r)**]**;

**Coefficient** (**parameter**)(**all**,r,REG)
 RORFLEX(r)
 *# flexibility of expected net ROR on capital stock in r wrt investment #*;
**Read**
 RORFLEX **from** **file** GTAPPARM **header** *"RFLX"*;
*!<
 RORFLEX is the flexibility of the expected net rate of return on the
 capital stock, in region r, with respect to investment. If a region's
 capital stock increases by 1%, then it is expected that the net rate of
 return on capital will decline by RORFLEX %. A larger absolute value for
 this parameter will reduce the tendency of international investment flows
 to respond to changes in expected rates of return.
>!*

**Equation** ROREXPECTED
*# expected rate of return depends on the current return and investment (HT 58) #*
(**all**,r,REG)
 rore(r) = rorc(r) - RORFLEX(r) * **[**ke(r) - kb(r)**]**;

*!<
 4-3. Capital Accumulation
 -------------------------

 based on the theory laid out in GTAP Technical Paper #7
>!*

**Variable** (**all**,i,ENDWC_COMM)(**all**,r,REG)
 EXPAND(i,r) *# change in investment levels relative to endowment stock #*;
**Equation** BALDWIN
*# change in investment levels relative to endowment stock #*
(**all**,i,ENDWC_COMM)(**all**,r,REG)
 EXPAND(i,r) = qcgds(r) - qo(i,r);

*!<
 4-4. Global Bank
 ----------------
>!*

**Coefficient** (**integer**,**parameter**)
 RORDELTA
 *# binary coefficient to switch mechanism of allocating investment funds #*;
**Read**
 RORDELTA **from** **file** GTAPPARM **header** *"RDLT"*;
*!<
 RORDELTA is a binary coefficient which determines the mechanism of
 allocating investment funds across regions. When RORDELTA = 1, investment
 funds are allocated across regions to equate the change in the expected
 rates of return (i.e., rore(r)). When RORDELTA = 0, investment funds are
 allocated across regions to maintain the existing composition of capital
 stocks.
>!*

**Variable**
 rorg *# global net rate of return on capital stock #*;
**Variable** (**all**,r,REG)
 cgdslack(r) *# slack variable for qcgds(r) #*;
*!<
 This is exogenous, unless the user wishes to exogenously fix the level of
 gross investment in a region, in which case it can be swapped with
 cgdslack.
>!*
**Equation** RORGLOBAL
*# either gross investment or expected rate of return in region r (HT 59) #*
(**all**,r,REG)
 RORDELTA * rore(r)
 + **[**1 - RORDELTA**]**
 * **[[**REGINV(r) / NETINV(r)**]** * qcgds(r) - **[**VDEP(r) / NETINV(r)**]** * kb(r)**]**
 = RORDELTA * rorg + **[**1 - RORDELTA**]** * globalcgds + cgdslack(r);
*!<
 This equation determines either gross investment or the expected rate of
 return in each region, depending on the setting for the binary RORDELTA
 parameter.
>!*

**Equation** GLOBALINV
*# either expected global rate of return or global net investment (HT 11) #*
 RORDELTA * globalcgds + **[**1 - RORDELTA**]** * rorg
 = RORDELTA
 * **sum**(r,REG,
 **[**REGINV(r) / GLOBINV**]** * qcgds(r) - **[**VDEP(r) / GLOBINV**]** * kb(r))
 + **[**1 - RORDELTA**]** * **sum**(r,REG, **[**NETINV(r) / GLOBINV**]** * rore(r));
*!<
 This equation computes either the change in global net investment (when
 RORDELTA = 1), or the change in the expected global rate of return on
 capital (when RORDELTA = 0).
>!*

*!<
 4-5. Price Index of Aggregate Global Composite Capital Goods
 ------------------------------------------------------------
>!*

**Equation** PRICGDS
*# eq'n generates a price index for the aggregate global cgds composite (HT 60) #*
 pcgdswld = **sum**(r,REG, **[**NETINV(r) / GLOBINV**]** * pcgds(r));

*!<
 4-6. Price of Saving
 --------------------
>!*

**Variable** (**all**,r,REG)
 psaveslack(r) *# slack variable for the savings price equation #*;
*!<
 This is exogenous under the normal closure. However, in order to
 replicate simulations from the GTAP book, where there was a single savings
 price, psaveslack may be swapped with psave in order to fix the latter.
 In this case, pcgdswld must be the numeraire so that each region faces the
 same price of savings.
>!*

**Equation** SAVEPRICE
*# savings price #*
(**all**,r,REG)
 psave(r)
 = pcgds(r)
 + **sum**(s,REG, **[[**NETINV(s) - SAVE(s)**]** / GLOBINV**]** * pcgds(s))
 + psaveslack(r);
*!<
 In contrast to the GTAP book, the price of savings is now region-specific
 and it changes at the same rate as the price of regional investment, plus
 an adjustment factor which accounts for the fact that savings and
 investment are not equal at the regional level.
>!*

*!<
 ----------------------
 5. International Trade
 ----------------------

 5-1. Export Prices
 5-2. Demand for Imports
>!*

*!<
 5-1. Export Prices
 ------------------
>!*

**Variable** (**all**,i,TRAD_COMM)(**all**,r,REG)
 tx(i,r) *# dest.-gen. change in subsidy on exports of i from r #*;
**Variable** (**all**,i,TRAD_COMM)(**all**,r,REG)(**all**,s,REG)
 txs(i,r,s) *# dest.-spec. change in subsidy on exports of i from r to s #*;
*!<
 The variable txs captures changes in the power of bilateral export taxes.
 However, the presence of a destination-generic export subsidy shift (tx)
 also permits the user to swap a single export tax shock with another
 target variable. It is most naturally swapped with the variable qo to
 insulate domestic producers from the world market.
>!*

**Equation** EXPRICES
*# eq'n links agent's and world prices (HT 27) #*
(**all**,i,TRAD_COMM)(**all**,r,REG)(**all**,s,REG)
 pfob(i,r,s) = pm(i,r) - tx(i,r) - txs(i,r,s);

**Equation** TEXPRATIO
*# change in ratio of export tax payments to regional income #*
(**all**,r,REG)
 100.0 * INCOME(r) * del_taxrexp(r) + TEX(r) * y(r)
 = **sum**(i,TRAD_COMM, **sum**(s,REG,
 VXMD(i,r,s) * **[**-tx(i,r) - txs(i,r,s)**]**
 + XTAXD(i,r,s) * **[**pfob(i,r,s) + qxs(i,r,s)**]**));

*!<
 5-2. Demand for Imports
 -----------------------

 Composite Imports Nest: Table 3 of Hertel and Tsigas
>!*

**Variable** (**all**,i,TRAD_COMM)(**all**,s,REG)
 tm(i,s) *# source-gen. change in tax on imports of i into s #*;
**Variable** (**all**,i,TRAD_COMM)(**all**,r,REG)(**all**,s,REG)
 tms(i,r,s) *# source-spec. change in tax on imports of i from r into s #*;
*!<
 The variable tms captures changes in the power of bilateral import taxes.
 However, the presence of a source-generic import tariff shift (tm) also
 permits the user to swap a single import tariff shock with another target
 variable. In particular, to insulate domestic producers from import price
 changes, it may be swapped with the relative price variable pr -- see
 below.
>!*

**Equation** MKTPRICES
*# eq'n links domestic and world prices (HT 24) #*
(**all**,i,TRAD_COMM)(**all**,r,REG)(**all**,s,REG)
 pms(i,r,s) = tm(i,s) + tms(i,r,s) + pcif(i,r,s);

**Coefficient** (**all**,i,TRAD_COMM)(**all**,r,REG)(**all**,s,REG)
 MSHRS(i,r,s) *# share of imports from r in import bill of s at mkt prices #*;
**Formula** (**all**,i,TRAD_COMM)(**all**,r,REG)(**all**,s,REG)
 MSHRS(i,r,s) = VIMS(i,r,s) / **sum**(k,REG, VIMS(i,k,s));
**Equation** DPRICEIMP
*# price for aggregate imports (HT 28) #*
(**all**,i,TRAD_COMM)(**all**,s,REG)
 pim(i,s) = **sum**(k,REG, MSHRS(i,k,s) * **[**pms(i,k,s) - ams(i,k,s)**]**);

**Variable** (**orig_level**=1.0)(**all**,i,TRAD_COMM)(**all**,r,REG)
 pr(i,r) *# ratio of domestic to imported prices in r #*;
**Equation** PRICETGT
*# eq'n defines target price ratio to be attained via the variable levy (HT 25) #*
(**all**,i,TRAD_COMM)(**all**,s,REG)
 pr(i,s) = pm(i,s) - pim(i,s);
*!<
 This equation defines the target price ratio to be attained via the
 variable levy. This price ratio is the ratio of domestic to average
 imported goods' price. Note that the way this price ratio is defined, it
 includes intraregional imports as well. In most applications, regions
 will represent groups of individual countries. However, in the case of
 the EU, this is problematic, since recent versions of the database have
 incorporated intra-EU trade flows. Therefore, when aggregated to the EU
 level, the composite import price includes both intra-EU and outside
 imports. So some modification is needed to handle the EU case.
>!*

**Coefficient** (**parameter**)(**all**,i,TRAD_COMM)
 ESUBM(i)
 *# region-generic el. of sub. among imports of i in Armington structure #*;
**Read**
 ESUBM **from** **file** GTAPPARM **header** *"ESBM"*;

**Equation** IMPORTDEMAND
*# regional demand for disaggregated imported commodities by source (HT 29) #*
(**all**,i,TRAD_COMM)(**all**,r,REG)(**all**,s,REG)
 qxs(i,r,s)
 = -ams(i,r,s) + qim(i,s)
 - ESUBM(i) * **[**pms(i,r,s) - ams(i,r,s) - pim(i,s)**]**;

**Equation** TIMPRATIO
*# change in ratio of import tax payments to regional income #*
(**all**,r,REG)
 100.0 * INCOME(r) * del_taxrimp(r) + TIM(r) * y(r)
 = **sum**(i,TRAD_COMM, **sum**(s,REG,
 VIMS(i,s,r) * **[**tm(i,r) + tms(i,s,r)**]**
 + MTAX(i,s,r) * **[**pcif(i,s,r) + qxs(i,s,r)**]**));

*!<
 -----------------------------------
 6. International Transport Services
 -----------------------------------

 6-0. Module-Specific Variables and Coefficients
 6-1. Demand for Global Transport Services
 6-2. Supply of Transport Services
>!*

*!<
 6-0. Module-Specific Variables and Coefficients
 -----------------------------------------------

 only used in this International Transport Services module
>!*

**Variable** (**all**,m,MARG_COMM)(**all**,i,TRAD_COMM)(**all**,r,REG)(**all**,s,REG)
 qtmfsd(m,i,r,s) *# international usage margin m on i from r to s #*;
*!<
 International margin usage, by Margin, Freight, Source, and Destination,
 i.e., the percent change in usage of m in transport of i from r to s.
>!*
**Variable** (**all**,m,MARG_COMM)(**all**,i,TRAD_COMM)(**all**,r,REG)(**all**,s,REG)
 atmfsd(m,i,r,s) *# tech change in m's shipping of i from region r to s #*;
*!<
 Technical progress in shipping by Margin, Freight, Source, and
 Destination. This is endogenous and driven by the following mode-,
 product-, source-, and destination-specific determinants.
>!*
**Variable** (**all**,m,TRAD_COMM)
 atm(m) *# tech change in mode m, worldwide #*;
**Variable** (**all**,i,TRAD_COMM)
 atf(i) *# tech change shipping of i, worldwide #*;
**Variable** (**all**,r,REG)
 ats(r) *# tech change shipping from region r #*;
**Variable** (**all**,s,REG)
 atd(s) *# tech change shipping to s #*;
**Variable** (**all**,m,MARG_COMM)(**all**,i,TRAD_COMM)(**all**,r,REG)(**all**,s,REG)
 atall(m,i,r,s) *# tech change in m's shipping of i from region r to s #*;
**Variable** (**all**,i,TRAD_COMM)(**all**,r,REG)(**all**,s,REG)
 ptrans(i,r,s) *# cost index for international transport of i from r to s #*;
*!<
 average cost index for margin services used in getting i from r to s
>!*
**Variable** (**all**,m,MARG_COMM)
 qtm(m) *# global margin usage #*;
**Variable** (**all**,m,MARG_COMM)
 pt(m) *# price of composite margins services, type #*;
*!<
 price index for commodity m in margin services usage
>!*

**Coefficient** (**ge** 0) (**all**,m,MARG_COMM)(**all**,i,TRAD_COMM)(**all**,r,REG)(**all**,s,REG)
 VTMFSD(m,i,r,s)
 *# int'l margin usage, by margin, freight, source, and destination #*;
**Update** (**all**,m,MARG_COMM)(**all**,i,TRAD_COMM)(**all**,r,REG)(**all**,s,REG)
 VTMFSD(m,i,r,s) = pt(m) * qtmfsd(m,i,r,s);
**Read**
 VTMFSD **from** **file** GTAPDATA **header** *"VTWR"*;

**Coefficient** (**all**,i,TRAD_COMM)(**all**,r,REG)(**all**,s,REG)
 VTFSD(i,r,s) *# aggregate value of svces in the shipment of i from r to s #*;
**Formula** (**all**,i,TRAD_COMM)(**all**,r,REG)(**all**,s,REG)
 VTFSD(i,r,s) = **sum**(m,MARG_COMM, VTMFSD(m,i,r,s));
*!<
 In a balanced data base, (all,i,TRAD_COMM)(all,r,REG)(all,s,REG),
 VIWS(i,r,s) = VXWD(i,r,s) + VTFSD(i,r,s).
>!*

**Coefficient** (**all**,m,MARG_COMM)
 VTMUSE(m) *# international margin services usage, by type #*;
**Formula** (**all**,m,MARG_COMM)
 VTMUSE(m) = **sum**(i,TRAD_COMM, **sum**(r,REG, **sum**(s,REG, VTMFSD(m,i,r,s))));

**Coefficient** (**all**,m,MARG_COMM)
 VTMPROV(m) *# international margin services provision #*;
**Formula** (**all**,m,MARG_COMM)
 VTMPROV(m) = **sum**(r,REG, VST(m,r));
*!<
 In a balanced data base, VTMPROV = VTMUSE.
>!*

**Coefficient** (**all**,r,REG)
 VTRPROV(r) *# international margin supply, by region #*;
**Formula** (**all**,r,REG)
 VTRPROV(r) = **sum**(m,MARG_COMM, VST(m,r));

**Coefficient**
 VT *# international margin supply #*;
**Formula**
 VT = **sum**(m,MARG_COMM, **sum**(r,REG, VST(m,r)));

*!<
 6-1. Demand for Global Transport Services
 -----------------------------------------
>!*

**Equation** QTRANS_MFSD
*# bilateral demand for transport services #*
(**all**,m,MARG_COMM)(**all**,i,TRAD_COMM)(**all**,r,REG)(**all**,s,REG)
 qtmfsd(m,i,r,s) = qxs(i,r,s) - atmfsd(m,i,r,s);
*!<
 This equation computes the bilateral demand for international
 transportation services. It reflects the fact that the demand for
 services along any particular route is proportional to the quantity of
 merchandise shipped [i.e., QXS(i,r,s)]. It is here that we introduce the
 potential for input-augmenting tech change, atmfsd(m,i,r,s), which is
 commodity- and route-specific. Thus, in the levels:
 ATMFSD(m,i,r,s) * QTMFSD(m,i,r,s) = QXS(i,r,s)
 where QTMFSD is the amount of composite margins services m used along this
 route. Technological improvements are reflected by atmfsd(i,r,s) > 0, and
 these reduce the margins services required for this i,r,s triplet. Tech.
 change also dampens the cost of shipping, thereby lowering the CIF price
 implied by a given FOB value (see 6-2).
>!*

**Coefficient** (**all**,m,MARG_COMM)(**all**,i,TRAD_COMM)(**all**,r,REG)(**all**,s,REG)
 VTMUSESHR(m,i,r,s) *# share of i,r,s usage in global demand for m #*;
**Formula** (**all**,m,MARG_COMM)(**all**,i,TRAD_COMM)(**all**,r,REG)(**all**,s,REG)
 VTMUSESHR(m,i,r,s) = VTFSD(i,r,s) / VT;
**Formula**
 (**all**,m,MARG_COMM: VTMUSE(m) <> 0.0)(**all**,i,TRAD_COMM)(**all**,r,REG)(**all**,s,REG)
 VTMUSESHR(m,i,r,s) = VTMFSD(m,i,r,s) / VTMUSE(m);

**Equation** TRANS_DEMAND
*# global demand for margin m #*
(**all**,m,MARG_COMM)
 qtm(m)
 = **sum**(i,TRAD_COMM, **sum**(r,REG, **sum**(s,REG,
 VTMUSESHR(m,i,r,s) * qtmfsd(m,i,r,s))));

*!<
 6-2. Supply of Transport Services
 ---------------------------------
>!*

**Coefficient** (**all**,m,MARG_COMM)(**all**,r,REG)
 VTSUPPSHR(m,r) *# share of region r in global supply of margin m #*;
**Formula** (**all**,m,MARG_COMM)(**all**,r,REG)
 VTSUPPSHR(m,r) = VTRPROV(r) / VT;
**Formula** (**all**,m,MARG_COMM: VTMPROV(m) <> 0.0)(**all**,r,REG)
 VTSUPPSHR(m,r) = VST(m,r) / VTMPROV(m);

**Equation** PTRANSPORT
*# generate price index for composite transportation services #*
(**all**,m,MARG_COMM)
 pt(m) = **sum**(r,REG, VTSUPPSHR(m,r) * pm(m,r));
*!<
 This equation generates a price index for transportation services based on
 zero profits. NOTE:
 (1) Sales to international transportation are not subject to export tax.
 This is why we base the costs to the transport sector on market prices
 of the goods sold to international transportation.
 (2) We assume that the supply shares for margin services are uniform
 across freight, source of freight, and destination.
 (cf. HT#7)
>!*

**Coefficient**
 VTUSE *# international margin services usage #*;
**Formula**
 VTUSE
 = **sum**(m,MARG_COMM, **sum**(i,TRAD_COMM, **sum**(r,REG, **sum**(s,REG,
 VTMFSD(m,i,r,s)))));

**Coefficient** (**all**,m,MARG_COMM)(**all**,i,TRAD_COMM)(**all**,r,REG)(**all**,s,REG)
 VTFSD_MSH(m,i,r,s) *# share of margin m in cost of getting i from r to s #*;
**Formula** (**all**,m,MARG_COMM)(**all**,i,TRAD_COMM)(**all**,r,REG)
 (**all**,s,REG: VTFSD(i,r,s) > 0.0)
 VTFSD_MSH(m,i,r,s) = VTMFSD(m,i,r,s) / VTFSD(i,r,s);
**Formula** (**all**,m,MARG_COMM)(**all**,i,TRAD_COMM)(**all**,r,REG)
 (**all**,s,REG: VTFSD(i,r,s) = 0.0)
 VTFSD_MSH(m,i,r,s) = VTMUSE(m) / VTUSE;

**Equation** TRANSCOSTINDEX
*# generates flow-specific modal average cost of transport index (cf. HT7) #*
(**all**,i,TRAD_COMM)(**all**,r,REG)(**all**,s,REG)
 ptrans(i,r,s)
 = **sum**(m,MARG_COMM, VTFSD_MSH(m,i,r,s) * **[**pt(m) - atmfsd(m,i,r,s)**]**);

**Equation** TRANSTECHANGE
*# generates flow-specific average rate of technical change #*
(**all**,m,MARG_COMM)(**all**,i,TRAD_COMM)(**all**,r,REG)(**all**,s,REG)
 atmfsd(m,i,r,s) = atm(m) + atf(i) + ats(r) + atd(s) + atall(m,i,r,s);

**Equation** TRANSVCES
*# generate demand for regional supply of global transportation service (HT 61) #*
(**all**,m,MARG_COMM)(**all**,r,REG)
 qst(m,r) = qtm(m) + **[**pt(m) - pm(m,r)**]**;
*!<
 This equation generates the international transport sector's derived
 demand for regional supplies of transportation services. It reflects a
 unitary elasticity of substitution between transportation services inputs
 from different regions.
>!*

**Coefficient** (**all**,i,TRAD_COMM)(**all**,r,REG)(**all**,s,REG)
 VIWSCOST(i,r,s) *# value of imports calculated as total cost of imports #*;
**Formula** (**all**,i,TRAD_COMM)(**all**,r,REG)(**all**,s,REG)
 VIWSCOST(i,r,s) = VXWD(i,r,s) + VTFSD(i,r,s);

**Zerodivide** (**zero_by_zero**) **default** 1;
**Coefficient** (**all**,i,TRAD_COMM)(**all**,r,REG)(**all**,s,REG)
 FOBSHR(i,r,s) *# FOB share in VIW #*;
**Formula** (**all**,i,TRAD_COMM)(**all**,r,REG)(**all**,s,REG)
 FOBSHR(i,r,s) = VXWD(i,r,s) / VIWSCOST(i,r,s);
**Zerodivide** (**zero_by_zero**) **OFF**;

**Coefficient** (**all**,i,TRAD_COMM)(**all**,r,REG)(**all**,s,REG)
 TRNSHR(i,r,s) *# transport share in VIW #*;
**Formula** (**all**,i,TRAD_COMM)(**all**,r,REG)(**all**,s,REG)
 TRNSHR(i,r,s) = 1 - FOBSHR(i,r,s);

**Equation** FOBCIF
*# eq'n links FOB and CIF prices for good i shipped from region r to s (HT 26') #*
(**all**,i,TRAD_COMM)(**all**,r,REG)(**all**,s,REG)
 pcif(i,r,s)
 = FOBSHR(i,r,s) * pfob(i,r,s)
 + TRNSHR(i,r,s) * ptrans(i,r,s);
*!<
 This equation links export and import prices for each commodity/route
 triplet. Note that technical change is embodied in ptrans(i,r,s) which is
 now a cost index, as opposed to (HT 26') where it represented the price of
 margins services.
>!*

*!<
 ---------------------
 7. Regional Household
 ---------------------

 7-0. Module-Specific Coefficients
 7-1. Supply of Endowments by the Regional Household
 7-2. Computation of Regional Income
 7-3. Regional Household Demand System
 7-4. Aggregate Utility
>!*

*!<
 7-0. Module-Specific Coefficients
 ---------------------------------

 only used in this Regional Household module
>!*

**Coefficient** (**all**,r,REG)
 XSHRPRIV(r) *# private expenditure share in regional income #*;
**Formula** (**all**,r,REG)
 XSHRPRIV(r) = PRIVEXP(r) / INCOME(r);

**Coefficient** (**all**,r,REG)
 XSHRGOV(r) *# government expenditure share in regional income #*;
**Formula** (**all**,r,REG)
 XSHRGOV(r) = GOVEXP(r) / INCOME(r);

**Coefficient** (**all**,r,REG)
 XSHRSAVE(r) *# saving share in regional income #*;
**Formula** (**all**,r,REG)
 XSHRSAVE(r) = SAVE(r) / INCOME(r);

**Variable** (**all**,r,REG)
 uelas(r) *# elasticity of cost of utility wrt utility #*;

**Variable** (**all**,r,REG)
 dppriv(r) *# private consumption distribution parameter #*;
**Variable** (**all**,r,REG)
 dpgov(r) *# government consumption distribution parameter #*;
**Variable** (**all**,r,REG)
 dpsave(r) *# saving distribution parameter #*;

*!<
 7-1. Supply of Endowments by the Regional Household
 ---------------------------------------------------
>!*

**Equation** FACTORINCPRICES
*# eq'n links pre- and post-tax endowment supply prices (HT 15) #*
(**all**,i,ENDW_COMM)(**all**,r,REG)
 ps(i,r) = **to**(i,r) + pm(i,r);

**Coefficient** (**all**,r,REG)
 TINC(r) *# income tax payments in r #*;
**Formula** (**all**,r,REG)
 TINC(r) = **sum**(i,ENDW_COMM, PTAX(i,r));

**Equation** TINCRATIO
*# change in ratio of income tax payments to regional income #*
(**all**,r,REG)
 100.0 * INCOME(r) * del_taxrinc(r) + TINC(r) * y(r)
 = **sum**(i,ENDW_COMM,
 VOA(i,r) * **[**-**to**(i,r)**]** + PTAX(i,r) * **[**pm(i,r) + qo(i,r)**]**);

**Coefficient** (**all**,i,ENDW_COMM)(**all**,j,PROD_COMM)(**all**,r,REG)
 REVSHR(i,j,r);
**Formula** (**all**,i,ENDW_COMM)(**all**,j,PROD_COMM)(**all**,r,REG)
 REVSHR(i,j,r) = VFM(i,j,r) / **sum**(k,PROD_COMM, VFM(i,k,r));
**Equation** ENDW_PRICE
*# eq'n generates the composite price for sluggish endowments (HT 50) #*
(**all**,i,ENDWS_COMM)(**all**,r,REG)
 pm(i,r) = **sum**(k,PROD_COMM, REVSHR(i,k,r) * pmes(i,k,r));

**Coefficient** (**parameter**)(**all**,i,ENDW_COMM)
 ETRAE(i)
 *# elst. of transformation for sluggish primary factor endowments #*;
**Read**
 ETRAE **from** **file** GTAPPARM **header** *"ETRE"*;
*!<
 ETRAE is the elasticity of transformation for sluggish primary factor
 endowments. It is non-positive, by definition.
>!*
**Equation** ENDW_SUPPLY
*# eq'n distributes the sluggish endowments across sectors (HT 51) #*
(**all**,i,ENDWS_COMM)(**all**,j,PROD_COMM)(**all**,r,REG)
 qoes(i,j,r) = qo(i,r) - endwslack(i,r) + ETRAE(i) * **[**pm(i,r) - pmes(i,j,r)**]**;

*!<
 7-2. Computation of Regional Income
 -----------------------------------
>!*

**Coefficient** (**all**,r,REG)
 FY(r) *# primary factor income in r net of depreciation #*;
**Formula** (**all**,r,REG)
 FY(r) = **sum**(i,ENDW_COMM, VOM(i,r)) - VDEP(r);
**Variable** (**all**,r,REG)
 fincome(r) *# factor income at market prices net of depreciation #*;
**Equation** FACTORINCOME
*# factor income at market prices net of depreciation #*
(**all**,r,REG)
 FY(r) * fincome(r)
 = **sum**(i,ENDW_COMM, VOM(i,r) * **[**pm(i,r) + qo(i,r)**]**)
 - VDEP(r) * **[**pcgds(r) + kb(r)**]**;

**Variable** (**change**)(**all**,r,REG)
 del_indtaxr(r) *# change in ratio of indirect taxes to INCOME in r #*;
**Equation** DINDTAXRATIO
*# change in ratio of indirect taxes to INCOME in r #*
(**all**,r,REG)
 del_indtaxr(r)
 = del_taxrpc(r) + del_taxrgc(r) + del_taxriu(r) + del_taxrfu(r)
 + del_taxrout(r) + del_taxrexp(r) + del_taxrimp(r);

**Variable** (**change**)(**all**,r,REG)
 del_ttaxr(r) *# change in ratio of taxes to INCOME in r #*;
**Equation** DTAXRATIO
*# change in ratio of taxes to INCOME in r #*
(**all**,r,REG)
 del_ttaxr(r)
 = del_taxrpc(r) + del_taxrgc(r) + del_taxriu(r) + del_taxrfu(r)
 + del_taxrout(r) + del_taxrexp(r) + del_taxrimp(r) + del_taxrinc(r);
*!<
 This variable can be swapped with the commodity- and source-generic
 consumption tax shift, tp(r), in order to generate a tax replacement
 scenario, whereby taxes remain a constant share of national income.
>!*

**Variable** (**all**,r,REG)
 incomeslack(r) *# slack variable in the expression for regional income #*;
*!<
 This is exogenous, unless the user wishes to fix regional income.
>!*

**Coefficient** (**all**,r,REG)
 INDTAX(r) *# indirect tax receipts in r #*;
**Formula** (**all**,r,REG)
 INDTAX(r) = TPC(r) + TGC(r) + TIU(r) + TFU(r) + TOUT(r) + TEX(r) + TIM(r);

**Equation** REGIONALINCOME
*# regional income = sum of primary factor income and indirect tax receipts #*
(**all**,r,REG)
 INCOME(r) * y(r)
 = FY(r) * fincome(r)
 + 100.0 * INCOME(r) * del_indtaxr(r)
 + INDTAX(r) * y(r)
 + INCOME(r) * incomeslack(r);
*!<
 This equation computes regional income as the sum of primary factor
 payment and indirect tax receipts. The first term computes the change in
 endowment income, net of depreciation. The subsequent terms compute the
 change in indirect tax receipts for various transactions taxes.
>!*

*!<
 7-3. Regional Household Demand System
 -------------------------------------
>!*

**Variable** (**all**,r,REG)
 dpav(r) *# average distribution parameter shift, for EV calc. #*;
**Equation** DPARAV
*# average distribution parameter shift #*
(**all**,r,REG)
 dpav(r)
 = XSHRPRIV(r) * dppriv(r)
 + XSHRGOV(r) * dpgov(r)
 + XSHRSAVE(r) * dpsave(r);

**Equation** UTILITELASTIC
*# elasticity of cost of utility wrt utility #*
(**all**,r,REG)
 uelas(r) = XSHRPRIV(r) * uepriv(r) - dpav(r);

**Equation** PRIVCONSEXP
*# private consumption expenditure #*
(**all**,r,REG)
 yp(r) - y(r) = -**[**uepriv(r) - uelas(r)**]** + dppriv(r);

**Equation** GOVCONSEXP
*# government consumption expenditure #*
(**all**,r,REG)
 yg(r) - y(r) = uelas(r) + dpgov(r);

**Equation** SAVING
*# saving #*
(**all**,r,REG)
 psave(r) + qsave(r) - y(r) = uelas(r) + dpsave(r);

*!<
 7-4. Aggregate Utility
 ----------------------
>!*

**Variable** (**all**,r,REG)
 p(r) *# price index for disposition of income by regional household #*;
**Equation** PRICEINDEXREG
 *# price index for disposition of income by regional household #*
 (**all**,r,REG)
 p(r)
 = XSHRPRIV(r) * ppriv(r)
 + XSHRGOV(r) * pgov(r)
 + XSHRSAVE(r) * psave(r);

**Variable** (**all**,r,REG)
 au(r) *# input-neutral shift in utility function #*;
**Variable** (**all**,r,REG)
 dpsum(r) *# sum of the distribution parameters #*;

**Coefficient** (**all**,r,REG)
 DPARSUM(r) *# sum of distribution parameters #*;
**Read**
 DPARSUM **from** **file** GTAPDATA **header** *"DPSM"*;
**Update** (**all**,r,REG)
 DPARSUM(r) = dpsum(r);

**Coefficient** (**all**,r,REG)
 UTILELAS(r) *# elasticity of cost of utility wrt utility #*;
**Formula** (**all**,r,REG)
 UTILELAS(r)
 = **[**UELASPRIV(r) * XSHRPRIV(r) + XSHRGOV(r) + XSHRSAVE(r)**]** / DPARSUM(r);

**Coefficient** (**all**,r,REG)
 DPARPRIV(r) *# private consumption distribution parameter #*;
**Formula** (**all**,r,REG)
 DPARPRIV(r) = UELASPRIV(r) * XSHRPRIV(r) / UTILELAS(r);

**Coefficient** (**all**,r,REG)
 DPARGOV(r) *# government consumption distribution parameter #*;
**Formula** (**all**,r,REG)
 DPARGOV(r) = XSHRGOV(r) / UTILELAS(r);

**Coefficient** (**all**,r,REG)
 DPARSAVE(r) *# saving distribution parameter #*;
**Formula** (**all**,r,REG)
 DPARSAVE(r) = XSHRSAVE(r) / UTILELAS(r);

**Coefficient** (**all**,r,REG)
 UTILPRIV(r) *# utility from private consumption #*;
**Formula** (**initial**)(**all**,r,REG)
 UTILPRIV(r) = 1.0;
**Update** (**all**,r,REG)
 UTILPRIV(r) = up(r);

**Coefficient** (**all**,r,REG)
 UTILGOV(r) *# utility from government consumption #*;
**Formula** (**initial**)(**all**,r,REG)
 UTILGOV(r) = 1.0;
**Update** (**all**,r,REG)
 UTILGOV(r) = ug(r);

**Coefficient** (**all**,r,REG)
 UTILSAVE(r) *# utility from saving #*;
**Formula** (**initial**)(**all**,r,REG)
 UTILSAVE(r) = 1.0;
**Update** (**change**) (**all**,r,REG)
 UTILSAVE(r) = **[[**qsave(r) - pop(r)**]** / 100**]** * UTILSAVE(r);

**Variable** (**all**,r,REG)
 u(r) *# per capita utility from aggregate hhld expend. in region r #*;
**Equation** UTILITY
*# regional household utility #*
(**all**,r,REG)
 u(r)
 = au(r)
 + DPARPRIV(r) * **loge**(UTILPRIV(r)) * dppriv(r)
 + DPARGOV(r) * **loge**(UTILGOV(r)) * dpgov(r)
 + DPARSAVE(r) * **loge**(UTILSAVE(r)) * dpsave(r)
 + **[**1.0 / UTILELAS(r)**]** * **[**y(r) - pop(r) - p(r)**]**;

**Equation** DISTPARSUM
*# sum of the distribution parameters #*
(**all**,r,REG)
 DPARSUM(r) * dpsum(r)
 = DPARPRIV(r) * dppriv(r)
 + DPARGOV(r) * dpgov(r)
 + DPARSAVE(r) * dpsave(r);

*!<
 -------------------------
 8. Equilibrium Conditions
 -------------------------

 8-1. Market Clearing Conditions
 8-2. Walras' Law
>!*

*!<
 8-1. Market Clearing Conditions
 -------------------------------
>!*

**Coefficient** (**all**,i,TRAD_COMM)(**all**,j,PROD_COMM)(**all**,r,REG)
 SHRDFM(i,j,r) *# share of dom. prod. i used by sector j in r at mkt prices #*;
**Formula** (**all**,i,TRAD_COMM)(**all**,j,PROD_COMM)(**all**,r,REG)
 SHRDFM(i,j,r) = VDFM(i,j,r) / VDM(i,r);

**Coefficient** (**all**,i,TRAD_COMM)(**all**,r,REG)
 SHRDPM(i,r) *# share of domestic prod. of i used by private hhlds in r #*;
**Formula** (**all**,i,TRAD_COMM)(**all**,r,REG)
 SHRDPM(i,r) = VDPM(i,r) / VDM(i,r);

**Coefficient** (**all**,i,TRAD_COMM)(**all**,r,REG)
 SHRDGM(i,r) *# share of imports of i used by gov't hhlds in r #*;
**Formula** (**all**,i,TRAD_COMM)(**all**,r,REG)
 SHRDGM(i,r) = VDGM(i,r) / VDM(i,r);

**Variable** (**orig_level**=VDM)(**all**,i,TRAD_COMM)(**all**,r,REG)
 qds(i,r) *# domestic sales of commodity i in r #*;
**Equation** MKTCLDOM
*# eq'n assures market clearing for domestic sales (HT 3) #*
(**all**,i,TRAD_COMM)(**all**,r,REG)
 qds(i,r)
 = **sum**(j,PROD_COMM, SHRDFM(i,j,r) * qfd(i,j,r))
 + SHRDPM(i,r) * qpd(i,r)
 + SHRDGM(i,r) * qgd(i,r);

**Coefficient** (**all**,i,TRAD_COMM)(**all**,r,REG)
 SHRDM(i,r) *# share of domestic sales of i in r #*;
**Formula** (**all**,i,TRAD_COMM)(**all**,r,REG)
 SHRDM(i,r) = VDM(i,r) / VOM(i,r);

**Coefficient** (**all**,m,MARG_COMM)(**all**,r,REG)
 SHRST(m,r) *# share of sales of m to global transport services in r #*;
**Formula** (**all**,m,MARG_COMM)(**all**,r,REG)
 SHRST(m,r) = VST(m,r) / VOM(m,r);

**Coefficient** (**all**,i,TRAD_COMM)(**all**,r,REG)(**all**,s,REG)
 SHRXMD(i,r,s) *# share of export sales of i to s in r #*;
**Formula** (**all**,i,TRAD_COMM)(**all**,r,REG)(**all**,s,REG)
 SHRXMD(i,r,s) = VXMD(i,r,s) / VOM(i,r);

**Variable** (**all**,i,TRAD_COMM)(**all**,r,REG)
 tradslack(i,r) *# slack variable in tradeables market clearing condition #*;
*!<
 This is exogenous unless the user wishes to specify the price of
 tradeables exogenously, in which case the analysis becomes partial
 equilibrium and walraslack must be exogenized.
>!*

**Equation** MKTCLTRD_MARG
*# eq'n assures market clearing for margins commodities (HT 1) #*
(**all**,m,MARG_COMM)(**all**,r,REG)
 qo(m,r)
 = SHRDM(m,r) * qds(m,r)
 + SHRST(m,r) * qst(m,r)
 + **sum**(s,REG, SHRXMD(m,r,s) * qxs(m,r,s))
 + tradslack(m,r);
**Equation** MKTCLTRD_NMRG
*# eq'n assures market clearing for the non-margins commodities (HT 1) #*
(**all**,i,NMRG_COMM)(**all**,r,REG)
 qo(i,r)
 = SHRDM(i,r) * qds(i,r)
 + **sum**(s,REG, SHRXMD(i,r,s) * qxs(i,r,s))
 + tradslack(i,r);

**Coefficient** (**all**,i,TRAD_COMM)(**all**,r,REG)
 VIM(i,r) *# value of imports of commodity i in r at domestic market prices #*;
**Formula** (**all**,i,TRAD_COMM)(**all**,r,REG)
 VIM(i,r) = **sum**(j,PROD_COMM, VIFM(i,j,r)) + VIPM(i,r) + VIGM(i,r);

**Coefficient** (**all**,i,TRAD_COMM)(**all**,j,PROD_COMM)(**all**,r,REG)
 SHRIFM(i,j,r) *# share of import i used by sector j in r #*;
**Formula** (**all**,i,TRAD_COMM)(**all**,j,PROD_COMM)(**all**,r,REG)
 SHRIFM(i,j,r) = VIFM(i,j,r) / VIM(i,r);

**Coefficient** (**all**,i,TRAD_COMM)(**all**,r,REG)
 SHRIPM(i,r) *# share of import i used by private hhlds in r #*;
**Formula** (**all**,i,TRAD_COMM)(**all**,r,REG)
 SHRIPM(i,r) = VIPM(i,r) / VIM(i,r);

**Coefficient** (**all**,i,TRAD_COMM)(**all**,r,REG)
 SHRIGM(i,r) *# the share of import i used by gov't hhlds in r #*;
**Formula** (**all**,i,TRAD_COMM)(**all**,r,REG)
 SHRIGM(i,r) = VIGM(i,r) / VIM(i,r);

**Equation** MKTCLIMP
*# eq'n assures mkt clearing for imported goods entering each region (HT 2) #*
(**all**,i,TRAD_COMM)(**all**,r,REG)
 qim(i,r)
 = **sum**(j,PROD_COMM, SHRIFM(i,j,r) * qfm(i,j,r))
 + SHRIPM(i,r) * qpm(i,r)
 + SHRIGM(i,r) * qgm(i,r);

**Coefficient** (**all**,i,ENDWM_COMM)(**all**,j,PROD_COMM)(**all**,r,REG)
 SHREM(i,j,r) *# share of mobile endowment i used by sector j at mkt prices #*;
**Formula** (**all**,i,ENDWM_COMM)(**all**,j,PROD_COMM)(**all**,r,REG)
 SHREM(i,j,r) = VFM(i,j,r) / VOM(i,r);

**Equation** MKTCLENDWM
*# eq'n assures mkt clearing for perfectly mobile endowments in each r (HT 4) #*
(**all**,i,ENDWM_COMM)(**all**,r,REG)
 qo(i,r) = **sum**(j,PROD_COMM, SHREM(i,j,r) * qfe(i,j,r)) + endwslack(i,r);
*!<
 This equation assures market clearing for perfectly mobile endowments (HT
 4)
>!*

**Equation** MKTCLENDWS
*# eq'n assures mkt clearing for imperfectly mobile endowments in each r (HT 5) #*
(**all**,i,ENDWS_COMM)(**all**,j,PROD_COMM)(**all**,r,REG)
 qoes(i,j,r) = qfe(i,j,r);
*!<
 This equation assures market clearing for sluggish endowments (HT 5)
>!*

*!<
 8-2. Walras' Law
 ----------------
>!*

**Variable**
 walras_sup *# supply in omitted market--global supply of cgds composite #*;
**Equation** WALRAS_S
*# Extra eq'n computes change in supply in the omitted market. #*
 walras_sup = pcgdswld + globalcgds;
*!<
 This is an extra equation which simply computes change in supply in the
 omitted market. (modified from HT 12 to reflect the value as opposed to
 quantity change, in light of the new treatment of psave(r))
>!*

**Variable**
 walras_dem *# demand in the omitted market--global demand for savings #*;
**Equation** WALRAS_D
*# Extra eq'n computes change in demand in the omitted market. #*
 GLOBINV * walras_dem = **sum**(r,REG, SAVE(r) * **[**psave(r) + qsave(r)**]**);
*!<
 This is an extra equation which simply computes change in demand in the
 omitted market. (modified from HT 13 to reflect the value as opposed to
 quantity change)
>!*

**Variable**
 walraslack *# slack variable in the omitted market #*;
*!<
 This is endogenous under normal, GE closure. If the GE links are broken,
 then this must be swapped with the numeraire, thereby forcing global
 savings to explicitly equal global investment.
>!*
**Equation** WALRAS
*# Check Walras' Law. Value of "walraslack" should be zero. (HT 14) #*
 walras_sup = walras_dem + walraslack;
*!<
 This equation checks Walras' Law. The value of walraslack should be zero
 in any GE simulation. (HT 14)
>!*

*!<
 ==========
 Appendices
 ==========

 A. Summary Indices
 B. Equivalent Variation
 C. Welfare Decomposition
 D. Terms of Trade Decomposition
>!*

*!<
 ------------------
 A. Summary Indices
 ------------------

 The following equations calculate many useful summary statistics. They do
 not generally affect the equilibrium structure of the model, although they
 do include the equation for the usual numeraire variable, "pfactwld". Some
 are documented in Hertel and Tsigas, many are new.

 A-0. Appendix-Specific Variables and Coefficients
 A-1. Factor Price Indices
 A-2. Regional Terms of Trade
 A-3. GDP Indices (Value, Price and Quantity)
 A-4. Aggregate Trade Indices (Value, Price and Quantity)
 A-5. Trade Balance Indices
>!*

*!<
 A-0. Appendix-Specific Variables and Coefficients
 -------------------------------------------------

 only used in this Summary Indices appendix
>!*

**Variable** (**all**,i,TRAD_COMM)(**all**,s,REG)
 vxwfob(i,s) *# value of merchandise regional exports, by commodity, FOB #*;
**Variable** (**all**,i,TRAD_COMM)(**all**,s,REG)
 viwcif(i,s) *# value of merchandise regional imports, by commodity, CIF #*;
**Variable** (**all**,r,REG)
 vxwreg(r) *# value of merchandise exports, by region #*;
**Variable** (**all**,r,REG)
 viwreg(r) *# value of merchandise imports, by region, at world prices #*;

**Coefficient** (**all**,i,TRAD_COMM)(**all**,r,REG)
 VXW(i,r) *# value of exports by comm. i and region r at FOB prices #*;
**Formula** (**all**,m,MARG_COMM)(**all**,r,REG)
 VXW(m,r) = **sum**(s,REG, VXWD(m,r,s)) + VST(m,r);
**Formula** (**all**,i,NMRG_COMM)(**all**,r,REG)
 VXW(i,r) = **sum**(s,REG, VXWD(i,r,s));

**Coefficient** (**all**,r,REG)
 VXWREGION(r) *# value of exports by region r at FOB prices #*;
**Formula** (**all**,r,REG)
 VXWREGION(r) = **sum**(i,TRAD_COMM, VXW(i,r));

**Coefficient** (**all**,i,TRAD_COMM)(**all**,s,REG)
 VIW(i,s) *# value of commodity imports i into s at CIF prices #*;
**Formula** (**all**,i,TRAD_COMM)(**all**,s,REG)
 VIW(i,s) = **sum**(r,REG, VIWS(i,r,s));
**Coefficient** (**all**,r,REG)
 VIWREGION(r) *# value of commodity imports by region r at CIF prices #*;
**Formula** (**all**,r,REG)
 VIWREGION(r) = **sum**(i,TRAD_COMM, VIW(i,r));

*!<
 A-1. Factor Price Indices
 -------------------------
>!*

**Variable** (**orig_level**=1.0)(**all**,i,ENDW_COMM)(**all**,r,REG)
 pfactreal(i,r) *# ratio of return to primary factor i to CPI in r #*;
**Equation** REALRETURN
*# eq'n defines the real rate of return to primary factor i in region r #*
(**all**,i,ENDW_COMM)(**all**,s,REG)
 pfactreal(i,s) = pm(i,s) - ppriv(s);
*!<
 This equation defines the real rate of return to primary factor i in
 region r (new).
>!*

**Coefficient** (**all**,r,REG)
 VENDWREG(r) *# value of primary factors, at mkt prices, by region #*;
**Formula** (**all**,r,REG)
 VENDWREG(r) = **sum**(i,ENDW_COMM, VOM(i,r));

**Variable** (**orig_level**=1.0)(**all**,r,REG)
 pfactor(r) *# market price index of primary factors, by region #*;
**Equation** PRIMFACTPR
*# computes % change in price index of primary factors, by region #*
(**all**,r,REG)
 VENDWREG(r) * pfactor(r) = **sum**(i,ENDW_COMM, VOM(i,r) * pm(i,r));

**Coefficient**
 VENDWWLD *# value of primary factors, at mkt prices, worldwide #*;
**Formula**
 VENDWWLD = **sum**(r,REG, VENDWREG(r));
**Variable** (**orig_level**=1.0)
 pfactwld *# world price index of primary factors #*;
**Equation** PRIMFACTPRWLD
*# computes % change in global price index of primary factors #*
 VENDWWLD * pfactwld = **sum**(r,REG, VENDWREG(r) * pfactor(r));

*!<
 A-2. Regional Terms of Trade
 ----------------------------

 The next three equations correspond to Table 10 of Hertel and Tsigas on
 Regional Terms of Trade.
>!*

**Variable** (**orig_level**=1.0)(**all**,r,REG)
 psw(r) *# index of prices received for tradeables produced in r #*;
**Equation** REGSUPRICE
*# estimate change in index of prices received for tradeables i produced in r #*
(**all**,r,REG)
 VXWREGION(r) * psw(r)
 = **sum**(i,TRAD_COMM, **sum**(s,REG, VXWD(i,r,s) * pfob(i,r,s)))
 + **sum**(m,MARG_COMM, VST(m,r) * pm(m,r));
*!<
 This equation estimates the change in the index of prices received for
 tradeable products produced in r. (modified from HT 64 to eliminate the
 investment component)
>!*

**Variable** (**orig_level**=1.0)(**all**,r,REG)
 pdw(r) *# index of prices paid for tradeables used in region r #*;
**Equation** REGDEMPRICE
*# estimate change in index of prices paid for tradeable products used in r #*
(**all**,r,REG)
 VIWREGION(r) * pdw(r)
 = **sum**(i,TRAD_COMM, **sum**(k,REG, VIWS(i,k,r) * pcif(i,k,r)));
*!<
 This equation estimates the change in the index of prices paid for
 tradeable products used in r. (modified from HT 65 to eliminate savings)
>!*

**Variable** (**orig_level**=1.0)(**all**,r,REG)
 tot(r) *# terms of trade for region r: tot(r) = psw(r) - pdw(r) #*;
**Equation** TOTeq
*# terms of trade equation computed as difference in psw and pdw (HT 66) #*
(**all**,r,REG)
 tot(r) = psw(r) - pdw(r);

*!<
 A-3. GDP Indices (Value, Price and Quantity)
 --------------------------------------------
>!*

**Coefficient** (**all**,r,REG)
 GDP(r) *# Gross Domestic Product in region r #*;
**Formula** (**all**,s,REG)
 GDP(s)
 = **sum**(i,TRAD_COMM, VPA(i,s))
 + **sum**(i,TRAD_COMM, VGA(i,s))
 + **sum**(k,CGDS_COMM, VOA(k,s))
 + **sum**(i,TRAD_COMM, **sum**(r,REG, VXWD(i,s,r)))
 + **sum**(m,MARG_COMM, VST(m,s))
 - **sum**(i,TRAD_COMM, **sum**(r,REG, VIWS(i,r,s)));
*!<
 Gross Domestic Product in region r. Trade is valued at FOB and CIF
 prices.
>!*

**Variable** (**all**,r,REG)
 vgdp(r) *# change in value of GDP #*;
**Equation** VGDP_r
*# change in value of GDP (HT 70) #*
(**all**,r,REG)
 GDP(r) * vgdp(r)
 = **sum**(i,TRAD_COMM, VGA(i,r) * **[**qg(i,r) + pg(i,r)**]**)
 + **sum**(i,TRAD_COMM, VPA(i,r) * **[**qp(i,r) + pp(i,r)**]**)
 + REGINV(r) * **[**qcgds(r) + pcgds(r)**]**
 + **sum**(i,TRAD_COMM, **sum**(s,REG, VXWD(i,r,s) * **[**qxs(i,r,s) + pfob(i,r,s)**]**))
 + **sum**(m,MARG_COMM, VST(m,r) * **[**qst(m,r) + pm(m,r)**]**)
 - **sum**(i,TRAD_COMM, **sum**(s,REG,
 VIWS(i,s,r) * **[**qxs(i,s,r) + pcif(i,s,r)**]**));

**Variable** (**orig_level**=1.0)(**all**,r,REG)
 pgdp(r) *# GDP price index #*;
**Equation** PGDP_r
*# GDP price index (HT 71) #*
(**all**,r,REG)
 GDP(r) * pgdp(r)
 = **sum**(i,TRAD_COMM, VGA(i,r) * pg(i,r))
 + **sum**(i,TRAD_COMM, VPA(i,r) * pp(i,r))
 + REGINV(r) * pcgds(r)
 + **sum**(i,TRAD_COMM, **sum**(s,REG, VXWD(i,r,s) * pfob(i,r,s)))
 + **sum**(m,MARG_COMM, VST(m,r) * pm(m,r))
 - **sum**(i,TRAD_COMM, **sum**(s,REG, VIWS(i,s,r) * pcif(i,s,r)));

**Variable** (**orig_level**=GDP)(**all**,r,REG)
 qgdp(r) *# GDP quantity index #*;
**Equation** QGDP_r
*# GDP quantity index #*
(**all**,r,REG)
 GDP(r) * qgdp(r)
 = **sum**(i,TRAD_COMM, VGA(i,r) * qg(i,r))
 + **sum**(i,TRAD_COMM, VPA(i,r) * qp(i,r))
 + REGINV(r) * qcgds(r)
 + **sum**(i,TRAD_COMM, **sum**(s,REG, VXWD(i,r,s) * qxs(i,r,s)))
 + **sum**(m,MARG_COMM, VST(m,r) * qst(m,r))
 - **sum**(i,TRAD_COMM, **sum**(s,REG, VIWS(i,s,r) * qxs(i,s,r)));
*!<
 modified from HT 72 for use with AnalyzeGE
>!*

**Variable** (**all**,i,PROD_COMM)(**all**,r,REG)
 compvalad(i,r) *# composition of value added for good i and region r #*;
**Equation** COMPVALADEQ
*# track change in composition of value added #*
(**all**,i,PROD_COMM)(**all**,r,REG)
 compvalad(i,r) = qo(i,r) - qgdp(r);

*!<
 A-4. Aggregate Trade Indices (Value, Price and Quantity)
 --------------------------------------------------------
>!*

*!<
 Common Variables and Coefficients
 Value Indices for Aggregate Trade
 Price Indices for Aggregate Trade
 Quantity Indices for Aggregate Trade
>!*

*!<
 Common Variables and Coefficients
 .................................

 only used in this Aggregate Trade Indices section
>!*

**Variable** (**orig_level**=1.0)(**all**,i,TRAD_COMM)(**all**,r,REG)
 pxw(i,r) *# aggregate exports price index of i from region r #*;

**Coefficient** (**all**,i,TRAD_COMM)
 VXWCOMMOD(i) *# value of world exports by commodity i at FOB prices #*;
**Formula** (**all**,i,TRAD_COMM)
 VXWCOMMOD(i) = **sum**(r,REG, VXW(i,r));

**Coefficient**
 VXWLD *# value of commodity exports, FOB, globally #*;
**Formula**
 VXWLD = **sum**(r,REG, VXWREGION(r));

**Coefficient** (**all**,i,TRAD_COMM)
 VIWCOMMOD(i) *# global value of commodity imports, CIF, by commodity #*;
**Formula** (**all**,i,TRAD_COMM)
 VIWCOMMOD(i) = **sum**(r,REG, VIW(i,r));

**Coefficient** (**all**,i,TRAD_COMM)(**all**,r,REG)
 PW_PM(i,r) *# ratio of world to domestic prices #*;
**Formula** (**all**,i,TRAD_COMM)(**all**,r,REG)
 PW_PM(i,r) = **sum**(s,REG, VXWD(i,r,s)) / **sum**(s,REG, VXMD(i,r,s));
**Coefficient** (**all**,i,TRAD_COMM)(**all**,r,REG)
 VOW(i,r) *# value of output in r at FOB including transportation services #*;
**Formula** (**all**,m,MARG_COMM)(**all**,r,REG)
 VOW(m,r) = VDM(m,r) * PW_PM(m,r) + **sum**(s,REG, VXWD(m,r,s)) + VST(m,r);
**Formula** (**all**,i,NMRG_COMM)(**all**,r,REG)
 VOW(i,r) = VDM(i,r) * PW_PM(i,r) + **sum**(s,REG, VXWD(i,r,s));

**Coefficient** (**all**,i,TRAD_COMM)
 VWOW(i) *# value of world supply at world prices for i #*;
**Formula** (**all**,i,TRAD_COMM)
 VWOW(i) = **sum**(r,REG, VOW(i,r));

**Coefficient** (**all**,i,TRAD_COMM)
 VWOU(i) *# value of world output of i at user prices #*;
**Formula** (**all**,i,TRAD_COMM)
 VWOU(i) = **sum**(s,REG, **[**VPA(i,s) + VGA(i,s)**]** + **sum**(j,PROD_COMM, VFA(i,j,s)));

*!<
 Value Indices for Aggregate Trade
 .................................
>!*

**Equation** VREGEX_ir_MARG
*# the change in FOB value of exports of m from r #*
(**all**,m,MARG_COMM)(**all**,r,REG)
 VXW(m,r) * vxwfob(m,r)
 = **sum**(s,REG, VXWD(m,r,s) * **[**qxs(m,r,s) + pfob(m,r,s)**]**)
 + VST(m,r) * **[**qst(m,r) + pm(m,r)**]**;
**Equation** VREGEX_ir_NMRG
*# the change in FOB value of exports of commodity i from r (HT 73) #*
(**all**,i,NMRG_COMM)(**all**,r,REG)
 VXW(i,r) * vxwfob(i,r)
 = **sum**(s,REG, VXWD(i,r,s) * **[**qxs(i,r,s) + pfob(i,r,s)**]**);

**Equation** VREGEX_r
*# computes % change in value of merchandise exports, by region (HT 75) #*
(**all**,r,REG)
 VXWREGION(r) * vxwreg(r) = **sum**(i,TRAD_COMM, VXW(i,r) * vxwfob(i,r));

**Variable** (**all**,i,TRAD_COMM)
 vxwcom(i) *# value of global merchandise exports by commodity #*;
**Equation** VWLDEX_i
*# computes % change in FOB value of global exports, by commodity (HT 77) #*
(**all**,i,TRAD_COMM)
 VXWCOMMOD(i) * vxwcom(i) = **sum**(r,REG, VXW(i,r) * vxwfob(i,r));

**Variable**
 vxwwld *# value of world trade #*;
**Equation** VWLDEX
*# computes % change in value of global exports (HT 79) #*
 VXWLD * vxwwld = **sum**(r,REG, VXWREGION(r) * vxwreg(r));

**Equation** VREGIM_is
*# the change in CIF value of imports of commodity i into s (HT 74) #*
(**all**,i,TRAD_COMM)(**all**,s,REG)
 VIW(i,s) * viwcif(i,s)
 = **sum**(r,REG, VIWS(i,r,s) * **[**pcif(i,r,s) + qxs(i,r,s)**]**);

**Equation** VREGIM_s
*# computes % change in value of imports, CIF basis, by region (HT 76) #*
(**all**,s,REG)
 VIWREGION(s) * viwreg(s) = **sum**(i,TRAD_COMM, VIW(i,s) * viwcif(i,s));

**Variable** (**all**,i,TRAD_COMM)
 viwcom(i) *# value of global merchandise imports i, at world prices #*;
**Equation** VWLDIM_i
*# computes % change in value of global imports, by commodity (HT 78) #*
(**all**,i,TRAD_COMM)
 VIWCOMMOD(i) * viwcom(i) = **sum**(s,REG, VIW(i,s) * viwcif(i,s));

**Variable** (**all**,i,TRAD_COMM)
 valuew(i) *# value of world supply of good i #*;
**Equation** VWLDOUT
*# change in value of world output of comm. i at FOB prices (HT 80) #*
(**all**,i,TRAD_COMM)
 VWOW(i) * valuew(i) = **sum**(r,REG, VOW(i,r) * **[**pxw(i,r) + qo(i,r)**]**);

**Variable** (**all**,i,TRAD_COMM)
 valuewu(i) *# value of world supply of good i at user prices #*;
**Equation** VWLDOUTUSE
*# change in value of world output of commodity i at user prices #*
(**all**,i,TRAD_COMM)
 VWOU(i) * valuewu(i)
 = **sum**(s,REG, VPA(i,s) * **[**pp(i,s) + qp(i,s)**]**
 + VGA(i,s) * **[**pg(i,s) + qg(i,s)**]**
 + **sum**(j,PROD_COMM, VFA(i,j,s) * **[**pf(i,j,s) + qf(i,j,s)**]**));

*!<
 Price Indices for Aggregate Trade
 .................................
>!*

**Equation** PREGEX_ir_MARG
*# change in FOB price index of exports of m from r #*
(**all**,m,MARG_COMM)(**all**,r,REG)
 VXW(m,r) * pxw(m,r)
 = **sum**(s,REG, VXWD(m,r,s) * pfob(m,r,s)) + VST(m,r) * pm(m,r);

**Equation** PREGEX_ir_NMRG
*# change in FOB price index of exports of commodity i from r (HT 81) #*
(**all**,i,NMRG_COMM)(**all**,r,REG)
 VXW(i,r) * pxw(i,r) = **sum**(s,REG, VXWD(i,r,s) * pfob(i,r,s));

**Variable** (**orig_level**=1.0)(**all**,r,REG)
 pxwreg(r) *# price index of merchandise exports, by region #*;
**Equation** PREGEX_r
*# computes % change in price index of exports, by region (HT 83) #*
(**all**,r,REG)
 VXWREGION(r) * pxwreg(r) = **sum**(i,TRAD_COMM, VXW(i,r) * pxw(i,r));

**Variable** (**orig_level**=1.0)(**all**,i,TRAD_COMM)
 pxwcom(i) *# price index of global merchandise exports by commodity #*;
**Equation** PWLDEX_i
*# computes % change in price index of exports, by commodity (HT 85) #*
(**all**,i,TRAD_COMM)
 VXWCOMMOD(i) * pxwcom(i) = **sum**(r,REG, VXW(i,r) * pxw(i,r));

**Variable** (**orig_level**=1.0)
 pxwwld *# price index of world trade #*;
**Equation** PWLDEX
*# computes % change in price index of global exports (HT 87) #*
 VXWLD * pxwwld = **sum**(r,REG, VXWREGION(r) * pxwreg(r));

**Variable** (**all**,i,TRAD_COMM)(**all**,r,REG)
 piw(i,r) *# world price of composite import i in region r #*;
**Equation** PREGIM_is
*# change in CIF price index of imports of commodity i into s (HT 82) #*
(**all**,i,TRAD_COMM)(**all**,s,REG)
 VIW(i,s) * piw(i,s) = **sum**(r,REG, VIWS(i,r,s) * pcif(i,r,s));

**Variable** (**orig_level**=1.0)(**all**,r,REG)
 piwreg(r) *# price index of merchandise imports, by region #*;
**Equation** PREGIM_s
*# computes % change in price index of imports, by region (HT 84) #*
(**all**,s,REG)
 VIWREGION(s) * piwreg(s) = **sum**(i,TRAD_COMM, VIW(i,s) * piw(i,s));

**Variable** (**orig_level**=1.0)(**all**,i,TRAD_COMM)
 piwcom(i) *# price index of global merchandise imports by commodity #*;
**Equation** PWLDIM_i
*# computes % change in price index of imports, by commodity (HT 86) #*
(**all**,i,TRAD_COMM)
 VIWCOMMOD(i) * piwcom(i) = **sum**(s,REG, VIW(i,s) * piw(i,s));

**Variable** (**all**,i,TRAD_COMM)
 pw(i) *# world price index for total good i supplies #*;
**Equation** PWLDOUT
*# change in index of world prices, FOB, for total production of i (HT 88) #*
(**all**,i,TRAD_COMM)
 VWOW(i) * pw(i) = **sum**(r,REG, VOW(i,r) * pxw(i,r));

**Variable** (**orig_level**=1.0)(**all**,i,TRAD_COMM)
 pwu(i) *# world price index for total good i supplies at user prices #*;
**Equation** PWLDUSE
*# change in index of user prices for deflating world production of i #*
(**all**,i,TRAD_COMM)
 VWOU(i) * pwu(i)
 = **sum**(s,REG, VPA(i,s) * pp(i,s)
 + VGA(i,s) * pg(i,s)
 + **sum**(j,PROD_COMM, VFA(i,j,s) * pf(i,j,s)));

*!<
 Quantity Indices for Aggregate Trade
 ....................................
>!*

**Variable** (**orig_level**=VXW)(**all**,i,TRAD_COMM)(**all**,r,REG)
 qxw(i,r) *# aggregate exports of i from region r, FOB weights #*;
**Equation** QREGEX_ir_MARG
*# change in volume of exports of margin commodity m from r #*
(**all**,m,MARG_COMM)(**all**,r,REG)
 VXW(m,r) * qxw(m,r)
 = **sum**(s,REG, VXWD(m,r,s) * qxs(m,r,s)) + VST(m,r) * qst(m,r);
**Equation** QREGEX_ir_NMRG
*# change in volume of exports of non-margin commodity i from r #*
(**all**,i,NMRG_COMM)(**all**,r,REG)
 VXW(i,r) * qxw(i,r) = **sum**(s,REG, VXWD(i,r,s) * qxs(i,r,s));
*!<
 modified from HT 89 for use with AnalyzeGE
>!*

**Variable** (**orig_level**=VXWREGION)(**all**,r,REG)
 qxwreg(r) *# volume of merchandise exports, by region #*;
**Equation** QREGEX_r
*# computes % change in quantity index of exports, by region #*
(**all**,r,REG)
 VXWREGION(r) * qxwreg(r) = **sum**(i,TRAD_COMM, VXW(i,r) * qxw(i,r));
*!<
 modified from HT 91 for use with AnalyzeGE
>!*

**Variable** (**orig_level**=VXWCOMMOD)(**all**,i,TRAD_COMM)
 qxwcom(i) *# volume of global merchandise exports by commodity #*;
**Equation** QWLDEX_i
*# computes % change in quantity index of exports, by commodity #*
(**all**,i,TRAD_COMM)
 VXWCOMMOD(i) * qxwcom(i) = **sum**(r,REG, VXW(i,r) * qxw(i,r));
*!<
 modified from HT 93 for use with AnalyzeGE
>!*

**Variable** (**orig_level**=VXWLD)
 qxwwld *# volume of world trade #*;
**Equation** QWLDEX
*# computes % change in quantity index of global exports #*
 VXWLD * qxwwld = **sum**(r,REG, VXWREGION(r) * qxwreg(r));
*!<
 modified from HT 95 for use with AnalyzeGE
>!*

**Variable** (**all**,i,TRAD_COMM)(**all**,s,REG)
 qiw(i,s) *# aggregate imports of i into region s, CIF weights #*;
**Equation** QREGIM_is
*# change in volume of imports of commodity i into s #*
(**all**,i,TRAD_COMM)(**all**,s,REG)
 VIW(i,s) * qiw(i,s) = **sum**(r,REG, VIWS(i,r,s) * qxs(i,r,s));
*!<
 modified from HT 90 for use with AnalyzeGE
>!*

**Variable** (**orig_level**=VIWREGION)(**all**,r,REG)
 qiwreg(r) *# volume of merchandise imports, by region #*;
**Equation** QREGIM_s
*# computes % change in quantity index of imports, by region #*
(**all**,s,REG)
 VIWREGION(s) * qiwreg(s) = **sum**(i,TRAD_COMM, VIW(i,s) * qiw(i,s));
*!<
 modified from HT 92 for use with AnalyzeGE
>!*

**Variable** (**orig_level**=VIWCOMMOD)(**all**,i,TRAD_COMM)
 qiwcom(i) *# volume of global merchandise imports by commodity #*;
**Equation** QWLDIM_i
*# computes % change in quantity index of imports, by commodity #*
(**all**,i,TRAD_COMM)
 VIWCOMMOD(i) * qiwcom(i) = **sum**(s,REG, VIW(i,s) * qiw(i,s));
*!<
 modified from HT 94 for use with AnalyzeGE
>!*

**Variable** (**all**,i,TRAD_COMM)
 qow(i) *# quantity index for world supply of good i #*;
**Equation** QWLDOUT
*# change in index of world production of i #*
(**all**,i,TRAD_COMM)
 VWOW(i) * qow(i) = **sum**(r,REG, VOW(i,r) * qo(i,r));
*!<
 modified from HT 96 for use with AnalyzeGE
>!*

**Variable** (**orig_level**=VWOU)(**all**,i,TRAD_COMM)
 qowu(i) *# quantity index for world supply of good i at user prices #*;
**Equation** QWLDOUTU
*# change in index of world production of i evaluated at user prices #*
(**all**,i,TRAD_COMM)
 VWOU(i) * qowu(i)
 = **sum**(s,REG, VPA(i,s) * qp(i,s)
 + VGA(i,s) * qg(i,s)
 + **sum**(j,PROD_COMM, VFA(i,j,s) * qf(i,j,s)));

*!<
 A-5. Trade Balance Indices
 --------------------------
>!*

**Variable** (**change**)(**all**,i,TRAD_COMM)(**all**,r,REG)
 DTBALi(i,r) *# change in trade balance by i and by r, $ US million #*;
*!<
 A positive value indicates that the change in exports exceeds the change
 in imports.
>!*
**Equation** TRADEBAL_i
*# computes change in trade balance by commodity and by region (HT 97) #*
(**all**,i,TRAD_COMM)(**all**,r,REG)
 DTBALi(i,r)
 = **[**VXW(i,r) / 100**]** * vxwfob(i,r) - **[**VIW(i,r) / 100**]** * viwcif(i,r);

**Variable** (**change**)(**all**,r,REG)
 DTBAL(r) *# change in trade balance X - M, $ US million #*;
**Equation** TRADEBALANCE
*# computes change in trade balance (X - M), by region (HT 98) #*
(**all**,r,REG)
 DTBAL(r)
 = **[**VXWREGION(r) / 100**]** * vxwreg(r) - **[**VIWREGION(r) / 100**]** * viwreg(r);

*!<
 In order to maintain homogeneity in the presence of a fixed trade balance,
 it is useful to have a nominal variable which this is measured against.
 The next equation provides this, and we recommend users fix DTBALR instead
 of fixing DTBAL in future simulations. The strategy is the same one used
 above for taxes.
>!*

**Coefficient** (**all**,r,REG)
 TBAL(r) *# trade balance for region r #*;
**Formula** (**all**,r,REG)
 TBAL(r) = VXWREGION(r) - VIWREGION(r);

**Variable** (**change**)(**all**,r,REG)
 DTBALR(r) *# change in ratio of trade balance to regional income #*;
**Equation** DTBALRATIO
*# change in ratio of trade balance to regional income #*
(**all**,r,REG)
 100 * INCOME(r) * DTBALR(r) = 100 * DTBAL(r) - TBAL(r) * y(r);

*!<
 -----------------------
 B. Equivalent Variation
 -----------------------

 B-0. Appendix-Specific Variables and Coefficients
 B-1. Government Consumption Shadow Demand System
 B-2. Private Consumption Shadow Demand System
 B-3. Regional Household Shadow Demand System
 B-4. Equivalent Variation

 This appendix calculates equivalent variation "EV" and world equivalent
 variation, "WEV", by determining the income "yev" that would be required
 to achieve the current actual utility level "u" in a shadow demand system
 in which prices are fixed.

 Section B-2 calculates the utility elasticity of private consumption
 expenditure, "ueprivev", within a shadow demand system for private
 consumption, for use in section B-3. B-3 calculates private consumption
 expenditure "ypev" for use in B-2, and regional income "yev" for use in
 B-4, within a shadow demand system for the regional household. B-4
 calculates "EV" and "WEV".
>!*

*!<
 B-0. Appendix-Specific Variables and Coefficients
 -------------------------------------------------

 only used in this Equivalent Variation section of the Summary Indices
 appendix
>!*

**Variable** (**all**,r,REG)
 uelasev(r)
 *# elasticity of cost of utility wrt utility, for EV calc. #*;
**Variable** (**all**,r,REG)
 ueprivev(r)
 *# utility elasticity of private consn expenditure, for EV calc. #*;
**Variable** (**all**,r,REG)
 ugev(r) *# per capita utility from gov't expend., for EV calc. #*;
**Variable** (**all**,r,REG)
 upev(r) *# per capita utility from private expend., for EV calc. #*;
**Variable** (**all**,r,REG)
 qsaveev(r) *# total quantity of savings demanded, for EV calc. #*;
**Variable** (**all**,r,REG)
 yev(r) *# regional household income in region r, for EV calc. #*;
**Variable** (**all**,r,REG)
 ypev(r)
 *# private consumption expenditure in region r, for EV calc. #*;
**Variable** (**all**,r,REG)
 ygev(r)
 *# government consumption expenditure in region r, for EV calc. #*;

**Coefficient** (**all**,r,REG)
 INCOMEEV(r) *# regional income, for EV calc. #*;
**Formula** (**initial**) (**all**,r,REG)
 INCOMEEV(r) = INCOME(r);
**Update** (**all**,r,REG)
 INCOMEEV(r) = yev(r);

**Coefficient** (**all**,r,REG)
 UTILPRIVEV(r) *# utility from private consumption, for EV calcs #*;
**Formula** (**initial**) (**all**,r,REG)
 UTILPRIVEV(r) = UTILPRIV(r);
**Update** (**all**,r,REG)
 UTILPRIVEV(r) = upev(r);

**Coefficient** (**all**,r,REG)
 UTILGOVEV(r) *# utility from private consumption, for EV calcs #*;
**Formula** (**initial**) (**all**,r,REG)
 UTILGOVEV(r) = UTILGOV(r);
**Update** (**all**,r,REG)
 UTILGOVEV(r) = ugev(r);

**Coefficient** (**all**,r,REG)
 UTILSAVEEV(r) *# utility from private consumption, for EV calcs #*;
**Formula** (**initial**) (**all**,r,REG)
 UTILSAVEEV(r) = UTILSAVE(r);
**Update** (**change**) (**all**,r,REG)
 UTILSAVEEV(r) = **[[**qsaveev(r) - pop(r)**]** / 100**]** * UTILSAVEEV(r);

*!<
 B-1. Government Consumption Shadow Demand System
 ------------------------------------------------
>!*

**Equation** GOVUSHD
*# utility from government consumption in r #*
(**all**,r,REG)
 ygev(r) - pop(r) = ugev(r);

*!<
 B-2. Private Consumption Shadow Demand System
 ---------------------------------------------
>!*

**Variable** (**all**,i,TRAD_COMM)(**all**,r,REG)
 qpev(i,r)
 *# private hhld demand for commodity i in region r, for EV calc. #*;

**Coefficient** (**all**,i,TRAD_COMM)(**all**,r,REG)
 VPAEV(i,r)
 *# private hhld expend. on i in r valued at agent's prices, for EV calc. #*;
**Formula** (**initial**) (**all**,i,TRAD_COMM)(**all**,r,REG)
 VPAEV(i,r) = VPA(i,r);
**Update** (**all**,i,TRAD_COMM)(**all**,r,REG)
 VPAEV(i,r) = qpev(i,r);

**Coefficient** (**all**,r,REG)
 VPAREGEV(r) *# private consumption expenditure in region r, for EV calc. #*;
**Formula** (**all**,r,REG)
 VPAREGEV(r) = **sum**(i,TRAD_COMM, VPAEV(i,r));
*!<
 VPAREGEV should agree with PRIVEXPEV.
>!*

**Coefficient** (**all**,i,TRAD_COMM)(**all**,r,REG)
 CONSHREV(i,r)
 *# share of private hhld consn devoted to good i in r, for EV calc. #*;
**Formula** (**all**,i,TRAD_COMM)(**all**,r,REG)
 CONSHREV(i,r) = VPAEV(i,r) / VPAREGEV(r);
**Coefficient** (**all**,i,TRAD_COMM)(**all**,r,REG)
 EYEV(i,r)
 *# expend. elast. of private hhld demand for i in r, for EV calc. #*;
**Formula** (**all**,i,TRAD_COMM)(**all**,r,REG)
 EYEV(i,r)
 = **[**1.0 / **sum**(n,TRAD_COMM, CONSHREV(n,r) * INCPAR(n,r))**]**
 * **[**INCPAR(i,r) * **[**1.0 - ALPHA(i,r)**]**
 + **sum**(n,TRAD_COMM, CONSHREV(n,r) * INCPAR(n,r) * ALPHA(n,r))**]**
 + ALPHA(i,r)
 - **sum**(n,TRAD_COMM, CONSHREV(n,r) * ALPHA(n,r));

**Equation** PRIVDMNDSEV
 *# private hhld demands for composite commodities, for EV calc. #*
 (**all**,i,TRAD_COMM)(**all**,r,REG)
 qpev(i,r) - pop(r) = EYEV(i,r) * **[**ypev(r) - pop(r)**]**;
*!<
 Prices are held constant for the EV calculation and so do not appear here.
>!*

**Coefficient** (**all**,r,REG)
 UELASPRIVEV(r)
 *# elast. of cost wrt utility from private consn, for EV calc. #*;
**Formula** (**all**,r,REG)
 UELASPRIVEV(r) = **sum**(i,TRAD_COMM, CONSHREV(i,r) * INCPAR(i,r));

**Equation** PRIVATEUEV
*# computation of utility from private consumption in r (HT 45) #*
(**all**,r,REG)
 ypev(r) - pop(r) = UELASPRIVEV(r) * upev(r);

**Coefficient** (**all**,i,TRAD_COMM)(**all**,r,REG)
 XWCONSHREV(i,r)
 *# expansion-parameter-weighted consumption share, for EV calc. #*;
**Formula** (**all**,i,TRAD_COMM)(**all**,r,REG)
 XWCONSHREV(i,r) = CONSHREV(i,r) * INCPAR(i,r) / UELASPRIVEV(r);

**Equation** UTILELASPRIVEV
 *# elasticity of cost wrt utility from private consn, for EV calc. #*
 (**all**,r,REG)
 ueprivev(r)
 = **sum**(i,TRAD_COMM, XWCONSHREV(i,r) * **[**qpev(i,r) - ypev(r)**]**);
*!<
 Prices are held constant for the EV calculation and so do not appear here.
>!*

*!<

 B-3. Regional Household Shadow Demand System
 --------------------------------------------
>!*

**Variable** (**all**,r,REG)
 ysaveev(r) *# NET savings expenditure, for EV calc. #*;

**Coefficient** (**all**,r,REG)
 PRIVEXPEV(r)
 *# private consumption expenditure in region r, for EV calc. #*;
**Formula** (**initial**) (**all**,r,REG)
 PRIVEXPEV(r) = PRIVEXP(r);
**Update** (**all**,r,REG)
 PRIVEXPEV(r) = ypev(r);
*!<
 PRIVEXPEV should agree with VPAREGEV.
>!*

**Coefficient** (**all**,r,REG)
 GOVEXPEV(r)
 *# government consumption expenditure in region r, for EV calc. #*;
**Formula** (**initial**) (**all**,r,REG)
 GOVEXPEV(r) = GOVEXP(r);
**Update** (**all**,r,REG)
 GOVEXPEV(r) = ygev(r);

**Coefficient** (**all**,r,REG)
 SAVEEV(r)
 *# saving in region r, for EV calc. #*;
**Formula** (**initial**) (**all**,r,REG)
 SAVEEV(r) = SAVE(r);
**Update** (**all**,r,REG)
 SAVEEV(r) = ysaveev(r);

**Coefficient** (**all**,r,REG)
 XSHRPRIVEV(r)
 *# private expenditure share in regional income, for EV calc. #*;
**Formula** (**all**,r,REG)
 XSHRPRIVEV(r) = PRIVEXPEV(r) / INCOMEEV(r);

**Coefficient** (**all**,r,REG)
 XSHRGOVEV(r)
 *# government expenditure share in regional income, for EV calc. #*;
**Formula** (**all**,r,REG)
 XSHRGOVEV(r) = GOVEXPEV(r) / INCOMEEV(r);

**Coefficient** (**all**,r,REG)
 XSHRSAVEEV(r) *# saving share in regional income, for EV calc. #*;
**Formula** (**all**,r,REG)
 XSHRSAVEEV(r) = SAVEEV(r) / INCOMEEV(r);

**Variable** (**all**,r,REG)
 dpavev(r) *# average distribution parameter shift, for EV calc. #*;
**Equation** DPARAVEV
*# average distribution parameter shift, for EV calc. #*
 (**all**,r,REG)
 dpavev(r)
 = XSHRPRIVEV(r) * dppriv(r)
 + XSHRGOVEV(r) * dpgov(r)
 + XSHRSAVEEV(r) * dpsave(r);

**Equation** UTILITELASTICEV
 *# elasticity of cost of utility wrt utility, for EV calc. #*
 (**all**,r,REG)
 uelasev(r) = XSHRPRIV(r) * ueprivev(r) - dpavev(r);

**Equation** PCONSEXPEV
*# private consumption expenditure, for EV calc. #*
 (**all**,r,REG)
 ypev(r) - yev(r) = -**[**ueprivev(r) - uelasev(r)**]** + dppriv(r);

**Equation** GOVCONSEXPEV
*# government consumption expenditure #*
(**all**,r,REG)
 ygev(r) - yev(r) = uelasev(r) + dpgov(r);

**Equation** SAVINGEV
*# saving #*
(**all**,r,REG)
 ysaveev(r) - yev(r) = uelasev(r) + dpsave(r);

**Equation** SAVEUEV
*# saving #*
(**all**,r,REG)
 qsaveev(r) = ysaveev(r);

*!<
 Note that because psave doesn't change, qsaveev moves with ysaveev.
>!*

**Coefficient** (**all**,r,REG)
 UTILELASEV(r)
 *# elasticity of cost of utility wrt utility, for EV calc. #*;
**Formula** (**initial**) (**all**,r,REG)
 UTILELASEV(r) = UTILELAS(r);
**Update** (**all**,r,REG)
 UTILELASEV(r) = uelasev(r);

**Equation** INCOME_EQUIV
*# equivalent income #*
(**all**,r,REG)
 u(r)
 = au(r)
 + DPARPRIV(r) * **loge**(UTILPRIVEV(r)) * dppriv(r)
 + DPARGOV(r) * **loge**(UTILGOVEV(r)) * dpgov(r)
 + DPARSAVE(r) * **loge**(UTILSAVEEV(r)) * dpsave(r)
 + **[**1.0 / UTILELASEV(r)**]** * **[**yev(r) - pop(r)**]**;

*!<
 B-4. Equivalent Variation
 -------------------------
>!*

**Variable** (**change**)(**all**,r,REG)
 EV(r) *# equivalent variation, $ US million #*;
**Equation** EVREG
*# regional EV (HT 67) #*
(**all**,r,REG)
 EV(r) = **[**INCOMEEV(r) / 100**]** * yev(r);

**Variable** (**change**)
 WEV *# equivalent variation for the world #*;
**Equation** EVWLD
*# EV for the world (HT 68) #*
 WEV = **sum**(r,REG, EV(r));

*!<
 ------------------------
 C. Welfare Decomposition
 ------------------------
 See GTAP Technical Paper No. 5 for derivation and interpretation.
>!*

**Coefficient** (**all**,r,REG)
 EVSCALFACT(r) *# equivalent variation scaling factor #*;
**Formula** (**all**,r,REG)
 EVSCALFACT(r) = **[**UTILELASEV(r) / UTILELAS(r)**]** * **[**INCOMEEV(r) / INCOME(r)**]**;

**Coefficient** (**all**,m,MARG_COMM)(**all**,s,REG)
 VTMD(m,s) *# aggregate value of svce m in shipments to s #*;
**Formula** (**all**,m,MARG_COMM)(**all**,s,REG)
 VTMD(m,s) = **sum**(i,TRAD_COMM, **sum**(r,REG, VTMFSD(m,i,r,s)));

**Variable** (**linear**,**change**)(**all**,r,REG)
 EV_ALT(r) *# regional EV computed in alternative way #*;
**Equation** EV_DECOMPOSITION
*# decomposition of Equivalent Variation #*
(**all**,r,REG)
 EV_ALT(r)
 = -**[**0.01 * UTILELASEV(r) * INCOMEEV(r)**]**
 * **[**DPARPRIV(r) * **loge**(UTILPRIVEV(r) / UTILPRIV(r)) * dppriv(r)
 + DPARGOV(r) * **loge**(UTILGOVEV(r) / UTILGOV(r)) * dpgov(r)
 + DPARSAVE(r) * **loge**(UTILSAVEEV(r) / UTILSAVE(r)) * dpsave(r)**]**
 + **[**0.01 * EVSCALFACT(r)**]**
 * **[sum**(i,NSAV_COMM, PTAX(i,r) * **[**qo(i,r) - pop(r)**]**)
 + **sum**(i,ENDW_COMM, **sum**(j,PROD_COMM,
 ETAX(i,j,r) * **[**qfe(i,j,r) - pop(r)**]**))
 + **sum**(i,TRAD_COMM, **sum**(j,PROD_COMM,
 IFTAX(i,j,r) * **[**qfm(i,j,r) - pop(r)**]**))
 + **sum**(i,TRAD_COMM, **sum**(j,PROD_COMM,
 DFTAX(i,j,r) * **[**qfd(i,j,r) - pop(r)**]**))
 + **sum**(i,TRAD_COMM, IPTAX(i,r) * **[**qpm(i,r) - pop(r)**]**)
 + **sum**(i,TRAD_COMM, DPTAX(i,r) * **[**qpd(i,r) - pop(r)**]**)
 + **sum**(i,TRAD_COMM, IGTAX(i,r) * **[**qgm(i,r) - pop(r)**]**)
 + **sum**(i,TRAD_COMM, DGTAX(i,r) * **[**qgd(i,r) - pop(r)**]**)
 + **sum**(i,TRAD_COMM, **sum**(s,REG, XTAXD(i,r,s) * **[**qxs(i,r,s) - pop(r)**]**))
 + **sum**(i,TRAD_COMM, **sum**(s,REG, MTAX(i,s,r) * **[**qxs(i,s,r) - pop(r)**]**))
 + **sum**(i,ENDW_COMM, VOA(i,r) * **[**qo(i,r) - pop(r)**]**)
 - VDEP(r) * **[**kb(r) - pop(r)**]**
 + **sum**(i,PROD_COMM, VOA(i,r) * ao(i,r))
 + **sum**(j,PROD_COMM, VVA(j,r) * ava(j,r))
 + **sum**(j,PROD_COMM, **sum**(i,ENDW_COMM, VFA(i,j,r) * afe(i,j,r)))
 + **sum**(j,PROD_COMM, **sum**(i,TRAD_COMM, VFA(i,j,r) * af(i,j,r)))
 + **sum**(m,MARG_COMM, **sum**(i,TRAD_COMM, **sum**(s,REG,
 VTMFSD(m,i,s,r) * atmfsd(m,i,s,r))))
 + **sum**(i,TRAD_COMM, **sum**(s,REG, VIMS(i,s,r) * ams(i,s,r)))
 + **sum**(i,TRAD_COMM, **sum**(s,REG, VXWD(i,r,s) * pfob(i,r,s)))
 + **sum**(m,MARG_COMM, VST(m,r) * pm(m,r))
 + NETINV(r) * pcgds(r)
 - **sum**(i,TRAD_COMM, **sum**(s,REG, VXWD(i,s,r) * pfob(i,s,r)))
 - **sum**(m,MARG_COMM, VTMD(m,r) * pt(m))
 - SAVE(r) * psave(r)**]**
 + 0.01 * INCOMEEV(r) * pop(r);

**Variable** (**linear**,**change**)
 WEV_ALT *# expression for WEV computed in alternative way #*;
**Equation** WORLDEV
*# Equivalent Variation for the world #*
 WEV_ALT = **sum**(r,REG, EV_ALT(r));

**Variable** (**linear**,**change**) (**all**,r,REG)
 CNTdpar(r) *# contribution to EV of change in distribution parameters #*;
**Equation** CNT_WEV_dpar
(**all**,r,REG)
 CNTdpar(r)
 = -0.01 * UTILELASEV(r) * INCOMEEV(r)
 * **[**DPARPRIV(r) * **loge**(UTILPRIVEV(r) / UTILPRIV(r)) * dppriv(r)
 + DPARGOV(r) * **loge**(UTILGOVEV(r) / UTILGOV(r)) * dpgov(r)
 + DPARSAVE(r) * **loge**(UTILSAVEEV(r) / UTILSAVE(r)) * dpsave(r)**]**;

**Variable** (**linear**,**change**) (**all**,r,REG)
 CNTpopr(r) *# contribution to EV in region r of change in population #*;
**Equation** CONT_EV_pop
(**all**,r,REG)
 CNTpopr(r) = 0.01 * INCOMEEV(r) * pop(r);

**Variable** (**linear**,**change**) (**all**,r,REG)
 CNTqor(r) *# contribution to EV in region r of output changes #*;
**Equation** CONT_EV_qor
(**all**,r,REG)
 CNTqor(r)
 = **sum**(i,NSAV_COMM,
 0.01 * EVSCALFACT(r) * PTAX(i,r) * **[**qo(i,r) - pop(r)**]**);

**Variable** (**linear**,**change**) (**all**,i,NSAV_COMM)(**all**,r,REG)
 CNTqoir(i,r)
 *# contribution to EV of changes in output of NSAV_COMM i in reg. r #*;
**Equation** CONT_EV_qoir
(**all**,i,NSAV_COMM)(**all**,r,REG)
 CNTqoir(i,r) = PTAX(i,r) * **[**0.01 * EVSCALFACT(r)**]** * **[**qo(i,r) - pop(r)**]**;

**Variable** (**linear**,**change**) (**all**,r,REG)
 CNTqfer(r)
 *# cont. to EV of changes in use of all ENDW_COMM in all ind. in reg. r #*;
**Equation** CONT_EV_qfer
(**all**,r,REG)
 CNTqfer(r)
 = **sum**(i,ENDW_COMM, **sum**(j,PROD_COMM,
 ETAX(i,j,r) * **[**0.01 * EVSCALFACT(r)**]** * **[**qfe(i,j,r) - pop(r)**]**));

**Variable** (**linear**,**change**) (**all**,i,ENDW_COMM)(**all**,r,REG)
 CNTqfeir(i,r)
 *# contribution to EV of changes in use of ENDW_COMM i in all ind. in r #*;
**Equation** CONT_EV_qfeir
(**all**,i,ENDW_COMM)(**all**,r,REG)
 CNTqfeir(i,r)
 = **sum**(j,PROD_COMM,
 ETAX(i,j,r) * **[**0.01 * EVSCALFACT(r)**]** * **[**qfe(i,j,r) - pop(r)**]**);

**Variable** (**linear**,**change**) (**all**,i,ENDW_COMM)(**all**,j,PROD_COMM)(**all**,r,REG)
 CNTqfeijr(i,j,r)
 *# cont. to EV of changes in use of ENDW_COMM i in ind. j of reg. r #*;
**Equation** CONT_EV_qfeijr
(**all**,i,ENDW_COMM)(**all**,j,PROD_COMM)(**all**,r,REG)
 CNTqfeijr(i,j,r)
 = ETAX(i,j,r) * **[**0.01 * EVSCALFACT(r)**]** * **[**qfe(i,j,r) - pop(r)**]**;

**Variable** (**linear**,**change**) (**all**,r,REG)
 CNTqfmr(r)
 *# cont. to EV of changes in use of imported int. in all ind. in reg. r #*;
**Equation** CONT_EV_qfmr
(**all**,r,REG)
 CNTqfmr(r)
 = **sum**(i,TRAD_COMM, **sum**(j,PROD_COMM,
 IFTAX(i,j,r) * **[**0.01 * EVSCALFACT(r)**]** * **[**qfm(i,j,r) - pop(r)**]**));

**Variable** (**linear**,**change**) (**all**,i,TRAD_COMM)(**all**,r,REG)
 CNTqfmir(i,r)
 *# cont. to EV of changes in use of imported int. i in all ind. in r #*;
**Equation** CONT_EV_qfmir
(**all**,i,TRAD_COMM)(**all**,r,REG)
 CNTqfmir(i,r)
 = **sum**(j,PROD_COMM,
 IFTAX(i,j,r) * **[**0.01 * EVSCALFACT(r)**]** * **[**qfm(i,j,r) - pop(r)**]**);

**Variable** (**linear**,**change**) (**all**,i,TRAD_COMM)(**all**,j,PROD_COMM)(**all**,r,REG)
 CNTqfmijr(i,j,r)
 *# cont. to EV of changes in use of imported int. i in ind. j of reg. r #*;
**Equation** CONT_EV_qfmijr
(**all**,i,TRAD_COMM)(**all**,j,PROD_COMM)(**all**,r,REG)
 CNTqfmijr(i,j,r)
 = IFTAX(i,j,r) * **[**0.01 * EVSCALFACT(r)**]** * **[**qfm(i,j,r) - pop(r)**]**;

**Variable** (**linear**,**change**) (**all**,r,REG)
 CNTqfdr(r)
 *# cont. to EV of changes in use of domestic int. in all ind. in reg. r #*;
**Equation** CONT_EV_qfdr
(**all**,r,REG)
 CNTqfdr(r)
 = **sum**(i,TRAD_COMM, **sum**(j,PROD_COMM,
 DFTAX(i,j,r) * **[**0.01 * EVSCALFACT(r)**]** * **[**qfd(i,j,r) - pop(r)**]**));

**Variable** (**linear**,**change**) (**all**,i,TRAD_COMM)(**all**,r,REG)
 CNTqfdir(i,r)
 *# contribution to EV of changes in use of domestic i in all ind. in r #*;
**Equation** CONT_EV_qfdir
(**all**,i,TRAD_COMM)(**all**,r,REG)
 CNTqfdir(i,r)
 = **sum**(j,PROD_COMM,
 DFTAX(i,j,r) * **[**0.01 * EVSCALFACT(r)**]** * **[**qfd(i,j,r) - pop(r)**]**);

**Variable** (**linear**,**change**) (**all**,i,TRAD_COMM)(**all**,j,PROD_COMM)(**all**,r,REG)
 CNTqfdijr(i,j,r)
 *# cont. to EV of changes in use of domestic int. i in ind. j of reg. r #*;
**Equation** CONT_EV_qfdijr
(**all**,i,TRAD_COMM)(**all**,j,PROD_COMM)(**all**,r,REG)
 CNTqfdijr(i,j,r)
 = DFTAX(i,j,r) * **[**0.01 * EVSCALFACT(r)**]** * **[**qfd(i,j,r) - pop(r)**]**;

**Variable** (**linear**,**change**) (**all**,r,REG)
 CNTqpmr(r)
 *# contribution to EV of changes in consumption of imported goods in r #*;
**Equation** CONT_EV_qpmr
(**all**,r,REG)
 CNTqpmr(r)
 = **sum**(i,TRAD_COMM,
 IPTAX(i,r) * **[**0.01 * EVSCALFACT(r)**]** * **[**qpm(i,r) - pop(r)**]**);

**Variable** (**linear**,**change**) (**all**,i,TRAD_COMM)(**all**,r,REG)
 CNTqpmir(i,r)
 *# cont. to EV of changes in consumption of imported good i in reg. r #*;
**Equation** CONT_EV_qpmir
(**all**,i,TRAD_COMM)(**all**,r,REG)
 CNTqpmir(i,r) = IPTAX(i,r) * **[**0.01 * EVSCALFACT(r)**]** * **[**qpm(i,r) - pop(r)**]**;

**Variable** (**linear**,**change**) (**all**,r,REG)
 CNTqpdr(r)
 *# contribution to EV of changes in consumption of domestic goods in r #*;
**Equation** CONT_EV_qpdr
(**all**,r,REG)
 CNTqpdr(r)
 = **sum**(i,TRAD_COMM,
 DPTAX(i,r) * **[**0.01 * EVSCALFACT(r)**]** * **[**qpd(i,r) - pop(r)**]**);

**Variable** (**linear**,**change**) (**all**,i,TRAD_COMM)(**all**,r,REG)
 CNTqpdir(i,r)
 *# cont. to EV of changes in consumption of domestic good i in reg. r #*;
**Equation** CONT_EV_qpdir
(**all**,i,TRAD_COMM)(**all**,r,REG)
 CNTqpdir(i,r) = DPTAX(i,r) * **[**0.01 * EVSCALFACT(r)**]** * **[**qpd(i,r) - pop(r)**]**;

**Variable** (**linear**,**change**) (**all**,r,REG)
 CNTqgmr(r)
 *# cont. to EV of changes in gov't consumption of imports in reg. r #*;
**Equation** CONT_EV_qgmr
(**all**,r,REG)
 CNTqgmr(r)
 = **sum**(i,TRAD_COMM,
 IGTAX(i,r) * **[**0.01 * EVSCALFACT(r)**]** * **[**qgm(i,r) - pop(r)**]**);

**Variable** (**linear**,**change**) (**all**,i,TRAD_COMM)(**all**,r,REG)
 CNTqgmir(i,r)
 *# cont. to EV of changes in gov't consumption of import i in reg. r #*;
**Equation** CONT_EV_qgmir
(**all**,i,TRAD_COMM)(**all**,r,REG)
 CNTqgmir(i,r) = IGTAX(i,r) * **[**0.01 * EVSCALFACT(r)**]** * **[**qgm(i,r) - pop(r)**]**;

**Variable** (**linear**,**change**) (**all**,r,REG)
 CNTqgdr(r)
 *# cont. to EV of changes in gov't consumption of domestics in reg. r #*;
**Equation** CONT_EV_qgdr
(**all**,r,REG)
 CNTqgdr(r)
 = **sum**(i,TRAD_COMM,
 DGTAX(i,r) * **[**0.01 * EVSCALFACT(r)**]** * **[**qgd(i,r) - pop(r)**]**);

**Variable** (**linear**,**change**) (**all**,i,TRAD_COMM)(**all**,r,REG)
 CNTqgdir(i,r)
 *# cont. to EV of changes in gov't consumption of domestic i in reg. r #*;
**Equation** CONT_EV_qgdir
(**all**,i,TRAD_COMM)(**all**,r,REG)
 CNTqgdir(i,r) = DGTAX(i,r) * **[**0.01 * EVSCALFACT(r)**]** * **[**qgd(i,r) - pop(r)**]**;

**Variable** (**linear**,**change**) (**all**,r,REG)
 CNTqxsr(r)
 *# cont. to EV of changes in exports of all goods from SRCE r to all DEST #*;
**Equation** CONT_EV_qxsr
(**all**,r,REG)
 CNTqxsr(r)
 = **sum**(i,TRAD_COMM, **sum**(s,REG,
 XTAXD(i,r,s) * **[**0.01 * EVSCALFACT(r)**]** * **[**qxs(i,r,s) - pop(r)**]**));

**Variable** (**linear**,**change**) (**all**,i,TRAD_COMM)(**all**,r,REG)(**all**,s,REG)
 CNTqxsirs(i,r,s)
 *# cont. to EV of changes in exports of i from SRCE r to DEST s #*;
**Equation** CONT_EV_qxsirs
(**all**,i,TRAD_COMM)(**all**,r,REG)(**all**,s,REG)
 CNTqxsirs(i,r,s)
 = XTAXD(i,r,s) * **[**0.01 * EVSCALFACT(r)**]** * **[**qxs(i,r,s) - pop(r)**]**;

**Variable** (**linear**,**change**) (**all**,r,REG)
 CNTqimr(r)
 *# cont. to EV of changes in imports of all goods from all SRCE to DEST r #*;
**Equation** CONT_EV_qimr
(**all**,r,REG)
 CNTqimr(r)
 = **sum**(i,TRAD_COMM, **sum**(s,REG,
 MTAX(i,s,r) * **[**0.01 * EVSCALFACT(r)**]** * **[**qxs(i,s,r) - pop(r)**]**));

**Variable** (**linear**,**change**) (**all**,i,TRAD_COMM)(**all**,s,REG)(**all**,r,REG)
 CNTqimisr(i,s,r)
 *# cont. to EV of changes in imports of i from SRCE s to DEST r #*;
**Equation** CONT_EV_qimisr
(**all**,i,TRAD_COMM)(**all**,s,REG)(**all**,r,REG)
 CNTqimisr(i,s,r)
 = MTAX(i,s,r) * **[**0.01 * EVSCALFACT(r)**]** * **[**qxs(i,s,r) - pop(r)**]**;

**Variable** (**linear**,**change**) (**all**,r,REG)
 CNTalleffr(r) *# total contribution to regional EV of allocative effects #*;
**Equation** CONT_EV_alleffr
(**all**,r,REG)
 CNTalleffr(r)
 = **[**0.01 * EVSCALFACT(r)**]**
 * **[sum**(i,NSAV_COMM, PTAX(i,r) * **[**qo(i,r) - pop(r)**]**)
 + **sum**(i,ENDW_COMM, **sum**(j,PROD_COMM,
 ETAX(i,j,r) * **[**qfe(i,j,r) - pop(r)**]**))
 + **sum**(i,TRAD_COMM, **sum**(j,PROD_COMM,
 IFTAX(i,j,r) * **[**qfm(i,j,r) - pop(r)**]**))
 + **sum**(i,TRAD_COMM, **sum**(j,PROD_COMM,
 DFTAX(i,j,r) * **[**qfd(i,j,r) - pop(r)**]**))
 + **sum**(i,TRAD_COMM, IPTAX(i,r) * **[**qpm(i,r) - pop(r)**]**)
 + **sum**(i,TRAD_COMM, DPTAX(i,r) * **[**qpd(i,r) - pop(r)**]**)
 + **sum**(i,TRAD_COMM, IGTAX(i,r) * **[**qgm(i,r) - pop(r)**]**)
 + **sum**(i,TRAD_COMM, DGTAX(i,r) * **[**qgd(i,r) - pop(r)**]**)
 + **sum**(i,TRAD_COMM, **sum**(s,REG, XTAXD(i,r,s) * **[**qxs(i,r,s) - pop(r)**]**))
 + **sum**(i,TRAD_COMM, **sum**(s,REG,
 MTAX(i,s,r) * **[**qxs(i,s,r) - pop(r)**]**))**]**;

**Variable** (**linear**,**change**) (**all**,i,DEMD_COMM)(**all**,r,REG)
 CNTalleffir(i,r)
 *# total contribution to regional EV of allocative effects #*;
**Equation** CONT_EV_alleffir_E
(**all**,i,ENDW_COMM)(**all**,r,REG)
 CNTalleffir(i,r)
 = **[**0.01 * EVSCALFACT(r)**]**
 * **[**PTAX(i,r) * **[**qo(i,r) - pop(r)**]**
 + **sum**(j,PROD_COMM, ETAX(i,j,r) * **[**qfe(i,j,r) - pop(r)**]**)**]**;
**Equation** CONT_EV_alleffir_T
(**all**,i,TRAD_COMM)(**all**,r,REG)
 CNTalleffir(i,r)
 = **[**0.01 * EVSCALFACT(r)**]**
 * **[**PTAX(i,r) * **[**qo(i,r) - pop(r)**]**
 + **sum**(j,PROD_COMM, IFTAX(i,j,r) * **[**qfm(i,j,r) - pop(r)**]**)
 + **sum**(j,PROD_COMM, DFTAX(i,j,r) * **[**qfd(i,j,r) - pop(r)**]**)
 + IPTAX(i,r) * **[**qpm(i,r) - pop(r)**]**
 + DPTAX(i,r) * **[**qpd(i,r) - pop(r)**]**
 + IGTAX(i,r) * **[**qgm(i,r) - pop(r)**]**
 + DGTAX(i,r) * **[**qgd(i,r) - pop(r)**]**
 + **sum**(s,REG, XTAXD(i,r,s) * **[**qxs(i,r,s) - pop(r)**]**)
 + **sum**(s,REG, MTAX(i,s,r) * **[**qxs(i,s,r) - pop(r)**]**)**]**;

**Variable** (**linear**,**change**) (**all**,r,REG)
 CNTtotr(r)
 *# contribution to regional EV of changes in its terms of trade #*;
**Equation** CONT_EV_totr
(**all**,r,REG)
 CNTtotr(r)
 = **[**0.01 * EVSCALFACT(r)**]**
 * **[sum**(i,TRAD_COMM, **sum**(s,REG, VXWD(i,r,s) * **[**pfob(i,r,s) - pxwwld**]**))
 + **sum**(m,MARG_COMM, VST(m,r) * **[**pm(m,r) - pxwwld**]**)
 - **sum**(i,TRAD_COMM, **sum**(s,REG, VXWD(i,s,r) * **[**pfob(i,s,r) - pxwwld**]**))
 - **sum**(m,MARG_COMM, VTMD(m,r) * **[**pt(m) - pxwwld**]**)**]**;

**Variable** (**linear**,**change**) (**all**,r,REG)
 CNTcgdsr(r) *# contribution to regional EV of changes in the price of cgds #*;
**Equation** CNT_EV_cgdsr
(**all**,r,REG)
 CNTcgdsr(r)
 = **[**0.01 * EVSCALFACT(r)**]**
 * **[**NETINV(r) * **[**pcgds(r) - pxwwld**]** - SAVE(r) * **[**psave(r) - pxwwld**]]**;

**Variable** (**linear**,**change**) (**all**,r,REG)
 CNTendwr(r) *# contribution to regional EV of changes in all ENDW_COMM #*;
**Equation** CONT_EV_endwr
(**all**,r,REG)
 CNTendwr(r)
 = **[**0.01 * EVSCALFACT(r)**]**
 * **[sum**(i,ENDW_COMM, VOA(i,r) * **[**qo(i,r) - pop(r)**]**)
 - VDEP(r) * **[**kb(r) - pop(r)**]]**;

**Variable** (**linear**,**change**) (**all**,i,ENDW_COMM)(**all**,r,REG)
 CNTendwir(i,r) *# contribution to regional EV of changes in ENDW_COMM i #*;
**Equation** CONT_EV_endwir
(**all**,i,ENDW_COMM)(**all**,r,REG)
 CNTendwir(i,r) = **[**0.01 * EVSCALFACT(r)**]** * **[**VOA(i,r) * **[**qo(i,r) - pop(r)**]]**;

**Variable** (**linear**,**change**) (**all**,r,REG)
 CNTtechr(r) *# contribution to regional EV of all technical change #*;
**Equation** CONT_EV_techr
(**all**,r,REG)
 CNTtechr(r)
 = **[**0.01 * EVSCALFACT(r)**]**
 * **[sum**(i,PROD_COMM, VOA(i,r) * ao(i,r))
 + **sum**(j,PROD_COMM, **sum**(i,ENDW_COMM, VFA(i,j,r) * afe(i,j,r)))
 + **sum**(j,PROD_COMM, VVA(j,r) * ava(j,r))
 + **sum**(j,PROD_COMM, **sum**(i,TRAD_COMM,
 **[**VIFA(i,j,r) + VDFA(i,j,r)**]** * af(i,j,r)))
 + **sum**(m,MARG_COMM, **sum**(i,TRAD_COMM, **sum**(s,REG,
 VTMFSD(m,i,s,r) * atmfsd(m,i,s,r))))
 + **sum**(i,TRAD_COMM, **sum**(s,REG, VIMS(i,s,r) * ams(i,s,r)))**]**;

**Variable** (**linear**,**change**) (**all**,r,REG)
 CNTtech_aor(r)
 *# contribution to regional EV of output augmenting technical change #*;
**Equation** CONT_EV_tech_aor
(**all**,r,REG)
 CNTtech_aor(r)
 = **[**0.01 * EVSCALFACT(r)**]** * **sum**(i,PROD_COMM, VOA(i,r) * ao(i,r));

**Variable** (**linear**,**change**) (**all**,i,PROD_COMM)(**all**,r,REG)
 CNTtech_aoir(i,r)
 *# cont. to regional EV of output augmenting tech change in TRAD_COMM i #*;
**Equation** CONT_EV_tech_aoir
(**all**,i,PROD_COMM)(**all**,r,REG)
 CNTtech_aoir(i,r) = **[**0.01 * EVSCALFACT(r)**]** * VOA(i,r) * ao(i,r);

**Variable** (**linear**,**change**) (**all**,r,REG)
 CNTtech_afer(r)
 *# contribution to regional EV of primary factor augmenting tech change #*;
**Equation** CONT_EV_tech_afer
(**all**,r,REG)
 CNTtech_afer(r)
 = **[**0.01 * EVSCALFACT(r)**]**
 * **sum**(j,PROD_COMM, **sum**(i,ENDW_COMM, VFA(i,j,r) * afe(i,j,r)));

**Variable** (**linear**,**change**) (**all**,i,ENDW_COMM)(**all**,j,PROD_COMM)(**all**,r,REG)
 CNTtech_afeijr(i,j,r)
 *# cont. to EV of primary factor i augmenting tech change in sector j #*;
**Equation** CONT_EV_tech_afeijr
(**all**,i,ENDW_COMM)(**all**,j,PROD_COMM)(**all**,r,REG)
 CNTtech_afeijr(i,j,r) = **[**0.01 * EVSCALFACT(r)**]** * VFA(i,j,r) * afe(i,j,r);

**Variable** (**linear**,**change**) (**all**,r,REG)
 CNTtech_avar(r)
 *# contribution to regional EV of value added augmenting tech change #*;
**Equation** CONT_EV_tech_avar
(**all**,r,REG)
 CNTtech_avar(r)
 = **[**0.01 * EVSCALFACT(r)**]** * **sum**(j,PROD_COMM, VVA(j,r) * ava(j,r));

**Variable** (**linear**,**change**) (**all**,j,PROD_COMM)(**all**,r,REG)
 CNTtech_avajr(j,r)
 *# cont. to EV of value added augmenting tech change in sector j #*;
**Equation** CONT_EV_tech_avajr
(**all**,j,PROD_COMM)(**all**,r,REG)
 CNTtech_avajr(j,r) = **[**0.01 * EVSCALFACT(r)**]** * VVA(j,r) * ava(j,r);

**Variable** (**linear**,**change**) (**all**,r,REG)
 CNTtech_afr(r)
 *# cont. to regional EV of comp. int. input augmenting tech change #*;
**Equation** CONT_EV_tech_afr
(**all**,r,REG)
 CNTtech_afr(r)
 = **[**0.01 * EVSCALFACT(r)**]**
 * **sum**(j,PROD_COMM, **sum**(i,TRAD_COMM,
 **[**VIFA(i,j,r) + VDFA(i,j,r)**]** * af(i,j,r)));

**Variable** (**linear**,**change**) (**all**,i,TRAD_COMM)(**all**,j,PROD_COMM)(**all**,r,REG)
 CNTtech_afijr(i,j,r)
 *# cont. to EV of composite i input augmenting tech change in sector j #*;
**Equation** CONT_EV_tech_afijr
(**all**,i,TRAD_COMM)(**all**,j,PROD_COMM)(**all**,r,REG)
 CNTtech_afijr(i,j,r)
 = **[**0.01 * EVSCALFACT(r)**]** * **[**VIFA(i,j,r) + VDFA(i,j,r)**]** * af(i,j,r);

**Variable** (**linear**,**change**) (**all**,r,REG)
 CNTtech_atrr(r)
 *# contribution to regional EV of technical change in transportation #*;
**Equation** CONT_EV_tech_atrr
(**all**,r,REG)
 CNTtech_atrr(r)
 = **[**0.01 * EVSCALFACT(r)**]**
 * **sum**(m,MARG_COMM, **sum**(i,TRAD_COMM, **sum**(s,REG,
 VTMFSD(m,i,s,r) * atmfsd(m,i,s,r))));

**Variable** (**linear**,**change**)(**all**,m,MARG_COMM)(**all**,i,TRAD_COMM)(**all**,r,REG)(**all**,s,REG)
 CNTtech_afmfdsd(m,i,r,s)
 *# cont. to EV of tech change in transportation efficiency #*;
**Equation** CONT_EV_tech_afmfdsd
(**all**,m,MARG_COMM)(**all**,i,TRAD_COMM)(**all**,r,REG)(**all**,s,REG)
 CNTtech_afmfdsd(m,i,r,s)
 = **[**0.01 * EVSCALFACT(s)**]** * VTMFSD(m,i,r,s) * atmfsd(m,i,r,s);

**Variable** (**linear**,**change**)(**all**,r,REG)
 CNTtech_amsr(r) *# cont. to EV of bilateral import-augmenting tech change #*;
**Equation** CONT_EV_tech_amsr
(**all**,r,REG)
 CNTtech_amsr(r)
 = **[**0.01 * EVSCALFACT(r)**]**
 * **sum**(i,TRAD_COMM, **sum**(s,REG, VIMS(i,s,r) * ams(i,s,r)));

**Variable** (**linear**,**change**) (**all**,i,TRAD_COMM)(**all**,r,REG)(**all**,s,REG)
 CNTtech_amsirs(i,r,s)
 *# cont. to EV of bilateral import augmenting tech change for TRAD_COMM i #*;
**Equation** CONT_EV_tech_amsirs
(**all**,i,TRAD_COMM)(**all**,r,REG)(**all**,s,REG)
 CNTtech_amsirs(i,r,s) = **[**0.01 * EVSCALFACT(r)**]** * VIMS(i,r,s) * ams(i,r,s);

**Variable** (**linear**,**change**) (**all**,r,REG)
 CNTkbr(r)
 *# cont. to EV of changes to beg. period capital stock and depreciation #*;
**Equation** CONT_EV_kbr
(**all**,r,REG)
 CNTkbr(r) = - **[**0.01 * EVSCALFACT(r)**]** * VDEP(r) * **[**kb(r) - pop(r)**]**;

*!<
 -------------------------------
 D. Terms of Trade Decomposition
 -------------------------------

 Computations for decomposition the terms-of-trade effect
 Reference: Robert McDougall, SALTER No. 12 Working Paper
>!*

**Coefficient** (**all**,i,TRAD_COMM)(**all**,r,REG)
 SX_IR(i,r) *# share of good i in total exports from r #*;
**Formula** (**all**,m,MARG_COMM)(**all**,r,REG)
 SX_IR(m,r)
 = **[sum**(s,REG, VXWD(m,r,s)) + VST(m,r)**]**
 / **[sum**(k,TRAD_COMM, **sum**(s,REG, VXWD(k,r,s)))
 + **sum**(l,MARG_COMM, VST(l,r))**]**;
**Formula** (**all**,i,NMRG_COMM)(**all**,r,REG)
 SX_IR(i,r)
 = **sum**(s,REG, VXWD(i,r,s))
 / **[sum**(k,TRAD_COMM, **sum**(s,REG, VXWD(k,r,s)))
 + **sum**(l,MARG_COMM, VST(l,r))**]**;

**Coefficient** (**all**,m,MARG_COMM)(**all**,s,REG)
 VTICOMM(m,s) *# margin usage of m in getting imports to region s #*;
**Formula** (**all**,m,MARG_COMM)(**all**,s,REG)
 VTICOMM(m,s) = **sum**(i,TRAD_COMM, **sum**(r,REG, VTMFSD(m,i,r,s)));

**Coefficient** (**all**,i,TRAD_COMM)(**all**,s,REG)
 VIWDIRALL(i,s) *# imports of i into s, with direct allocation of margins #*;
**Formula** (**all**,m,MARG_COMM)(**all**,s,REG)
 VIWDIRALL(m,s) = **sum**(r,REG, VXWD(m,r,s)) + VTICOMM(m,s);
**Formula** (**all**,i,NMRG_COMM)(**all**,s,REG)
 VIWDIRALL(i,s) = **sum**(r,REG, VXWD(i,r,s));

**Coefficient** (**all**,s,REG)
 VIWDATOT(s) *# total imports into s, calculated on direct allocation basis #*;
**Formula** (**all**,s,REG)
 VIWDATOT(s) = **sum**(i,TRAD_COMM, VIWDIRALL(i,s));

**Coefficient** (**all**,i,TRAD_COMM)(**all**,r,REG)
 SM_IR(i,r) *# share of good i in total imports into r #*;
**Formula** (**all**,i,TRAD_COMM)(**all**,s,REG)
 SM_IR(i,s) = VIWDIRALL(i,s) / VIWDATOT(s);

**Zerodivide** (**zero_by_zero**) **default** 0;
**Coefficient** (**all**,i,TRAD_COMM)(**all**,r,REG)(**all**,s,REG)
 SX_IRS(i,r,s) *# share of exports of good i from region r to s #*;
**Formula** (**all**,m,MARG_COMM)(**all**,r,REG)(**all**,s,REG)
 SX_IRS(m,r,s) = VXWD(m,r,s) / **[sum**(k,REG, VXWD(m,r,k)) + VST(m,r)**]**;
**Formula** (**all**,i,NMRG_COMM)(**all**,r,REG)(**all**,s,REG)
 SX_IRS(i,r,s) = VXWD(i,r,s) / **sum**(k,REG, VXWD(i,r,k));
**Zerodivide** (**zero_by_zero**) **off**;

**Coefficient** (**all**,m,MARG_COMM)(**all**,r,REG)
 SXT_IR(m,r) *# share of margins in exports of good i from region r #*;
**Formula** (**all**,m,MARG_COMM)(**all**,r,REG)
 SXT_IR(m,r) = VST(m,r) / **[sum**(k,REG, VXWD(m,r,k)) + VST(m,r)**]**;

**Variable** (**all**,i,TRAD_COMM)(**all**,r,REG)
 px_ir(i,r) *# export price index for good i and region r #*;
**Equation** EXPPRICE_MARG
*# price index for total exports of m from r #*
(**all**,m,MARG_COMM)(**all**,r,REG)
 px_ir(m,r)
 = **sum**(s,REG, SX_IRS(m,r,s) * pfob(m,r,s)) + SXT_IR(m,r) * pm(m,r);
**Equation** EXPPRICE_NMRG
*# price index for total exports of i from r #*
(**all**,i,NMRG_COMM)(**all**,r,REG)
 px_ir(i,r) = **sum**(s,REG, SX_IRS(i,r,s) * pfob(i,r,s));

**Coefficient** (**all**,i,TRAD_COMM)(**all**,r,REG)(**all**,s,REG)
 SM_IRS(i,r,s) *# share of imports of good i into s from r at FOB prices #*;
**Formula** (**all**,i,TRAD_COMM)(**all**,r,REG)(**all**,s,REG)
 SM_IRS(i,r,s) = VXWD(i,r,s) / VIWDIRALL(i,s);

**Coefficient** (**all**,m,MARG_COMM)(**all**,r,REG)
 SMT_IR(m,r) *# share of transport cost in imports of margin commodity #*;
**Formula** (**all**,m,MARG_COMM)(**all**,s,REG)
 SMT_IR(m,s) = VTICOMM(m,s) / VIWDIRALL(m,s);

**Variable** (**all**,i,TRAD_COMM)(**all**,r,REG)
 pm_ir(i,r) *# imports price index for good i and region r #*;
**Equation** IMPPRICE1_MARG
*# price index for total imports of m in s -- margins commodities #*
(**all**,m,MARG_COMM)(**all**,s,REG)
 pm_ir(m,s)
 = **sum**(r,REG, SM_IRS(m,r,s) * pfob(m,r,s)) + SMT_IR(m,s) * pt(m);
**Equation** IMPPRICE1_NMRG
*# price index for total imports of i in s -- non-margins commodities #*
(**all**,i,NMRG_COMM)(**all**,s,REG)
 pm_ir(i,s) = **sum**(r,REG, SM_IRS(i,r,s) * pfob(i,r,s));

**Coefficient** (**all**,i,TRAD_COMM)(**all**,r,REG)
 SW_IR(i,r) *# share of region r exports in world total for good i #*;
**Formula** (**all**,m,MARG_COMM)(**all**,r,REG)
 SW_IR(m,r)
 = **[sum**(s,REG, VXWD(m,r,s)) + VST(m,r)**]**
 / **sum**(k,REG, **sum**(s,REG, VXWD(m,k,s)) + VST(m,k));
**Formula** (**all**,i,NMRG_COMM)(**all**,r,REG)
 SW_IR(i,r)
 = **sum**(s,REG, VXWD(i,r,s)) / **sum**(k,REG, **sum**(s,REG, VXWD(i,k,s)));

**Variable** (**all**,i,TRAD_COMM)
 px_i(i) *# world export price index for commodity i #*;
**Equation** WRLDPRICEi
*# world export price index for good i #*
(**all**,i,TRAD_COMM)
 px_i(i) = **sum**(r,REG, SW_IR(i,r) * px_ir(i,r));

**Coefficient** (**all**,i,TRAD_COMM)
 SW_I(i) *# share of exports of i in world total #*;
**Formula** (**all**,m,MARG_COMM)
 SW_I(m)
 = **sum**(r,REG, **sum**(s,REG, VXWD(m,r,s)) + VST(m,r))
 / **[sum**(k,TRAD_COMM, **sum**(r,REG, **sum**(s,REG, VXWD(k,r,s))))
 + **sum**(l,MARG_COMM, **sum**(r,REG, VST(l,r)))**]**;
**Formula** (**all**,i,NMRG_COMM)
 SW_I(i)
 = **sum**(r,REG, **sum**(s,REG, VXWD(i,r,s)))
 / **[sum**(k,TRAD_COMM, **sum**(r,REG, **sum**(s,REG, VXWD(k,r,s))))
 + **sum**(l,MARG_COMM, **sum**(r,REG, VST(l,r)))**]**;

**Variable**
 px_ *# world export price index for all commodities #*;
**Equation** WRLDPRICE
*# world export price index for all goods #*
 px_ = **sum**(i,TRAD_COMM, SW_I(i) * px_i(i));

**Variable** (**all**,i,TRAD_COMM)(**all**,r,REG)
 c1_ir(i,r) *# contribution of world price, px_i, to ToT #*;
**Equation** c1_irEQ
*# contribution of world export price index of good i to ToT for region r #*
(**all**,i,TRAD_COMM)(**all**,r,REG)
 c1_ir(i,r) = **[**SX_IR(i,r) - SM_IR(i,r)**]** * **[**px_i(i) - px_**]**;

**Variable** (**all**,i,TRAD_COMM)(**all**,r,REG)
 c2_ir(i,r) *# contribution of regional export price, px_ir, to ToT #*;
**Equation** c2_irEQ
*# contribution of regional export price of good i for region r #*
(**all**,i,TRAD_COMM)(**all**,r,REG)
 c2_ir(i,r) = SX_IR(i,r) * **[**px_ir(i,r) - px_i(i)**]**;

**Variable** (**all**,i,TRAD_COMM)(**all**,r,REG)
 c3_ir(i,r) *# contribution of regional import price, pm_ir, to ToT #*;
**Equation** c3_irEQ
*# contribution of imports price index of good i for region r #*
(**all**,i,TRAD_COMM)(**all**,r,REG)
 c3_ir(i,r) = SM_IR(i,r) * **[**pm_ir(i,r) - px_i(i)**]**;

**Variable** (**all**,r,REG)
 c1_r(r) *# contribution of world prices for all goods to ToT #*;
**Equation** c1_rEQ
*# contribution of world price indexes of all goods to ToT for r #*
(**all**,r,REG)
 c1_r(r) = **sum**(i,TRAD_COMM, c1_ir(i,r));

**Variable** (**all**,r,REG)
 c2_r(r) *# contribution of regional export prices to ToT #*;
**Equation** c2_rEQ
*# contribution of regional exports prices to ToT for r #*
(**all**,r,REG)
 c2_r(r) = **sum**(i,TRAD_COMM, c2_ir(i,r));

**Variable** (**all**,r,REG)
 c3_r(r) *# contribution of regional import prices to ToT #*;
**Equation** c3_rEQ
*# contribution of regional import prices to ToT for r #*
(**all**,r,REG)
 c3_r(r) = **sum**(i,TRAD_COMM, c3_ir(i,r));

**Variable** (**all**,r,REG)
 tot2(r) *# trade terms for region r, computed from components #*;
**Equation** TOT2eq
*# trade terms for region r, computed from components #*
(**all**,r,REG)
 tot2(r) = c1_r(r) + c2_r(r) - c3_r(r);

*!
Variable (change)(all,i,TRAD_COMM)(all,r,REG)(all,s,REG)
 delMTAX(i,r,s) # change in tariff rev #;
Equation E_delMTAX (all,i,TRAD_COMM)(all,r,REG)(all,s,REG)
 delMTAX(i,r,s) = 0.01*[VIMS(i,r,s)*{pms(i,r,s) +qxs(i,r,s)}]
 - 0.01*[VIWS(i,r,s)*{pcif(i,r,s)+qxs(i,r,s)}];
BackSolve delMTAX using E_delMTAX;
!*

*!<
 ====================
 END OF GTAP.TAB FILE
 ====================
>!*
